# Supplementary material for: A benchmark of batch-effect correction methods for single-cell RNA sequencing data
Source: Genome Biol. 2020 Jan 16;21:12. doi: 10.1186/s13059-019-1850-9 (PMC6964114; doi:10.1186/s13059-019-1850-9)
Supplement: Supplementary file 1 — Additional file 1: Table S1. Detailed description of datasets. The table lists the dataset sources, number of batches, number of cells per batch, and sequencing technology. [file 13059_2019_1850_MOESM1_ESM.xlsx]

## Sheet: Sheet1
Table S1: Detailed description of datasets
Dataset	Accession	Description	Number of batches	Number of cells	Total cell number	Technologies used	Batch Effects	Reference	Source
1	GSE80171	Human Dendritic Cells	2	576	576	SMART-seq	Same technology; Same tissue	Villani et al.	https://www.ncbi.nlm.nih.gov/geo/query/acc.cgi?acc=GSE80171
2	GSE108097	Murine Atlas	2	4239	6954	microwell-seq	Different technology; Different tissue	Han et al.	https://www.ncbi.nlm.nih.gov/geo/query/acc.cgi?acc=GSE108097
	GSE109774			2715		10X		Tabula Muris Consortium	https://www.ncbi.nlm.nih.gov/geo/query/acc.cgi?acc=GSE109774
3	Simulation: Refer to Simulation table
4	GSE85241	Human Pancreas	5	2122	14767	CelSeq2	Different technology; Same tissue	Muraro et al.	https://hemberg-lab.github.io/scRNA.seq.datasets/human/pancreas/
	E-MTAB-5061			2127		SMART-seq2		Segerstolpe et al.
	GSE84133			8569		inDrops		Baron et al.
	GSE83139			457		SMARTer		Wang et al.
	GSE81608			1492		SMARTer		Xin et al.
5	3' dataset	Human Peripheral Blood Mononuclear Cell	2	8098	15476	10X	Same Technology; Same tissue	Zheng et al.	ftp://ngs.sanger.ac.uk/production/teichmann/BBKNN/PBMC.merged.h5ad
	5' dataset			7378		10X
6	293T	Cell line	3	2885	9530	10X	Same Technology; Different tissue	Zheng et al.	http://scanorama.csail.mit.edu/data.tar.gz.
	Jurkat			3258		10X
	50%:50% Jurkat:293T Cell Mixture			3388		10X
7	GSE81904	Mouse Retina	2	26830	71638	Drop-seq	Same technology; Same tissue	Shekhar et al.	https://hemberg-lab.github.io/scRNA.seq.datasets/mouse/retina/
	GSE63473			44808		Drop-seq		Macosko et al.
8	GSE116470	Mouse Brain	2	691600	833206	Drop-seq	Different technology; Same tissue	Saunders et al.	http://scanorama.csail.mit.edu/data.tar.gz.
	GSE110823			141606		SPLiT-seq		Rosenberg et al.
9	Bone Marrow	Human Cell Atlas	2	321463	621466	10X	Same Technology; Different tissue	Li, B. et al.	https://preview.data.humancellatlas.org.
	Cord Blood			300003		10X
10	GSE81682	Mouse Haematopoietic Stem	2	1920	4649	SMART-seq2	Different technology; Same tissue	Nestorowa et al.	https://www.ncbi.nlm.nih.gov/geo/query/acc.cgi?acc=GSE81682
	GSE72857	and Progenitor Cells		2729		MARS-seq		Paul et al.	https://www.ncbi.nlm.nih.gov/geo/query/acc.cgi?acc=GSE72857
11	GSE60361	Murine Atlas	8	267815	3005	Fluidigm C1	Different technology; Different tissues		ftp://ngs.sanger.ac.uk/production/teichmann/BBKNN/MouseAtlas.zip
	GSE109774				97029	SMART-Seq2 & 10x
	GSE108097				40000	Microwell-seq
	GSE107910				24279	Drop-seq
	GSE107585				57979	10x
	GSE100597				721	G&T-seq
	GSE106973				44802	SMART-Seq2 & 10x
	GSE107727
