# Supplementary material for: A benchmark of batch-effect correction methods for single-cell RNA sequencing data
Source: Genome Biol. 2020 Jan 16;21:12. doi: 10.1186/s13059-019-1850-9 (PMC6964114; doi:10.1186/s13059-019-1850-9)
Supplement: Supplementary file 2 — Additional file 2: Table S2. Cell count per cell type. Breakdown of cell count per cell type for each dataset. [file 13059_2019_1850_MOESM2_ESM.xlsx]

## Sheet: Sheet1
Table S2: Cell count per cell type
Dataset 1
Celltypes	Batch1	Batch2
CD141	96	0
CD1C	0	96
DoubleNeg	96	96
pDC	96	96
Dataset 2
Celltypes	Batch1	Batch2
B-cell	325	781
Dendritic	202	18
Endothelial	432	702
Epithelial	355	35
Macrophage	425	44
Monocyte	386	94
Neutrophil	311	143
NK	36	49
Smooth-muscle	97	66
Stromal	701	331
T-cell	969	452
Dataset 4
Celltypes	Baron_b1	Mutaro_b2	Segerstolpe_b3	Wang_b4	Xin_b5
acinar	958	219	185	6	0
alpha	2326	812	886	190	886
beta	2525	448	270	111	472
delta	601	193	114	9	49
ductal	1077	245	386	96	0
endothelial	252	21	16	0	0
epsilon	18	3	7	0	0
gamma	255	101	197	18	85
macrophage	55	0	0	0	0
mast	25	0	7	0	0
mesenchymal	0	80	0	27	0
MHC class II	0	0	5	0	0
schwann	13	0	0	0	0
stellate	457	0	54	0	0
t_cell	7	0	0	0	0
Dataset 5
Celltypes	Batch1	Batch2
B cell	1199	1172
CD4 T cell	2267	2183
CD8 T cell	2076	1066
Hematopoietic stem cell	17	7
Megakaryocyte	49	57
Monocyte_CD14	1914	2176
Monocyte_FCGR3A	206	355
NK cell	303	290
Plasmacytoid dendritic cell	67	72
Dataset 6
Celltypes	Batch1	Batch2	Batch3
293T	2885	0	1605
Jurkat	0	3258	1783
Dataset 7
Celltypes	Batch1	Batch2
amacrine	252	4426
astrocytes	0	54
bipolar	23494	6285
cones	48	1868
fibroblasts	0	85
ganglion	0	432
horizontal	0	252
microglia	0	67
muller	2945	1624
pericytes	0	63
rods	91	29400
vascular_endothelium	0	252
Dataset 8
Celltypes	batch1	batch2
Astrocyte	56819	10538
Choroid_plexus	94	0
Endothelial	46095	432
Ependymal	2083	416
Macrophage	1701	40
Microglia	5394	323
Mitotic	17	0
Mural	12748	59
Neurogenesis	2515	0
Neuron	440642	120030
Olfactory ensheathing cells	0	178
Oligodendrocyte	110867	3852
Polydendrocyte	12625	4651
Vascular and leptomeningeal cells	0	1087
Dataset 10
Celltypes	Batch1	Batch2
CMP	480	328
GMP	1154	123
LMPP	0	280
LTHSC	0	323
MEP	1095	362
MPP	0	368
Unsorted	0	136
