# Supplementary material for: A benchmark of batch-effect correction methods for single-cell RNA sequencing data
Source: Genome Biol. 2020 Jan 16;21:12. doi: 10.1186/s13059-019-1850-9 (PMC6964114; doi:10.1186/s13059-019-1850-9)
Supplement: Supplementary file 5 — Additional file 5: Table S4. Evaluation metrics. Detailed assessment metric scores and F-score for all methods on all datasets. [file 13059_2019_1850_MOESM5_ESM.xlsx]

## Sheet: Sheet1
Table S4: Evaluation metrics
ARI_Dataset 1
Method	1 - ARI batch	ARI cell type	fscore
ComBat	1.00242	0.646035	0.883673
fastMNN	1.00256	0.749461	0.957752
Harmony	1.00289	0.67759	0.909181
LIGER	1.00084	0.563306	0.811334
limma	1.00231	0.76388	0.966048
MMD-ResNet	1.00165	0.808982	0.991053
MNN_Correct	1.00292	0.689337	0.917853
Raw	1.00165	0.808982	0.991053
Scanorama	1.00206	0.720566	0.935926
scGen	1.00125	0.643184	0.876717
scMerge	1.00258	0.748165	0.95703
Seurat_2	1.00338	0.687577	0.918555
Seurat_3	1.00314	0.681742	0.913285
ZINB-WaVE	0.905676	0.00296544	NA
ASW_Dataset 1
Methods	1 - ASW batch	ASW cell type	fscore
ComBat	0.996825	0.210819	0.728922
fastMNN	1.00058	0.307856	0.851622
Harmony	0.998799	0.347368	0.88876
LIGER	1.00351	0.454888	1
limma	0.966954	0.352608	0.807838
MMD-ResNet	0.829725	0.320406	0
MNN Correct	0.983456	0.269832	0.773254
Raw	0.832237	0.321441	0.0283777
Scanorama	0.98569	0.296542	0.806332
scGen	0.975178	0.269761	0.754415
scMerge	0.984964	0.323166	0.83113
Seurat 2	1.00231	0.0523848	0.482667
Seurat 3	0.985525	0.128879	0.597677
ZINB-WaVE	0.93422	-0.135991	0
LISI_Dataset 1
Methods	iLISI median norm	1 - cLISI median norm	fscore
LIGER	0.932128	0.977001	0.991575
fastMNN	0.905068	0.977001	0.975252
ComBat	0.877853	0.976861	0.958015
scGen	0.869495	0.976962	0.952898
Scanorama	0.852531	0.977001	0.942004
scMerge	0.850312	0.977001	0.940552
Harmony	0.788847	0.977001	0.898689
Seurat_3	0.513049	0.975054	0.659491
limma	0.379489	0.977001	0.505359
Seurat_2	0.94644	0.795997	0.354718
MNN_Correct	0.264625	0.977001	0.338893
MMD-ResNet	0.0898893	0.976273	4.05904e-05
Raw	0.0898719	0.976273	0
ZINB-WaVE	0.389853	0.746248	0
kBET_Dataset 1
methods	0.05	0.1	0.15	0.2	0.25	median_val
Seurat_2	1	1	1	1	1	1
LIGER	0.947	0.974	0.974	1	1	0.974
ComBat	0.842	0.842	0.895	0.947	0.947	0.895
fastMNN	0.921	0.895	0.868	0.842	0.816	0.868
Scanorama	0.763	0.684	0.711	0.763	0.763	0.763
scMerge	0.816	0.711	0.658	0.711	0.632	0.711
scGen	0.737	0.632	0.684	0.658	0.658	0.658
Harmony	0.737	0.553	0.447	0.395	0.395	0.447
limma	0.197	0.184	0.237	0.263	0.342	0.237
Seurat_3	0.421	0.263	0.184	0.132	0.105	0.184
ZINB-WaVE	0.395	0.263	0.184	0.105	0.026	0.184
MNN_Correct	0.289	0.184	0.158	0.079	0.026	0.158
MMD-ResNet	0.026	0.026	0.026	0.026	0.053	0.026
Raw	0.026	0.026	0.026	0.026	0.026	0.026
ARI_Dataset 2
Method	1 - ARI batch	ARI cell type	fscore
ComBat	0.957958	0.5873	0.90824
fastMNN	0.964834	0.59851	0.922805
Harmony	0.969504	0.667399	0.980166
LIGER	0.984895	0.395655	0.732712
limma	0.969301	0.48807	0.826132
MMD-ResNet	0.991894	0.413492	0.75739
MNN_Correct	0.970155	0.580961	0.912258
Raw	0.39459	0.0162528	NA
Scanorama	0.94951	0.510454	0.834888
scGen	0.941979	0.42549	0.745181
scMerge	0.971888	0.570929	0.904939
Seurat_2	0.979992	0.465401	0.809204
Seurat_3	0.992771	0.486809	0.839003
ZINB-WaVE	0.937184	0.504191	0.820704
ASW_Dataset 2
Methods	1 - ASW batch	ASW cell type	fscore
ComBat	0.935202	0.155442	0.866395
fastMNN	0.95856	0.217053	0.938629
Harmony	0.98043	0.248109	0.986358
LIGER	0.981587	0.102488	0.867055
limma	0.977309	0.115885	0.875523
MMD-ResNet	0.962765	0.0951765	0.84357
MNN Correct	0.981602	0.185489	0.939275
Raw	0.541801	-0.414445	0
Scanorama	0.943988	0.138104	0.862119
scGen	0.941145	0.126013	0.849377
scMerge	0.992563	0.0925576	0.866999
Seurat 2	0.96726	0.12988	0.878474
Seurat 3	0.989461	0.215295	0.971327
ZINB-WaVE	0.965117	0.0538202	0.806533
LISI_Dataset 2
Methods	iLISI median norm	1 - cLISI median norm	fscore
LIGER	0.50558	0.985248	0.887196
scGen	0.400403	0.9892	0.850667
Harmony	0.366595	0.989182	0.799163
Seurat_3	0.359007	0.989346	0.78937
MNN_Correct	0.323896	0.988873	0.723632
Scanorama	0.310878	0.988282	0.69321
Seurat_2	0.199379	0.986942	0.446316
fastMNN	0.183496	0.989366	0.416028
ZINB-WaVE	0.138285	0.973464	0.203656
MMD-ResNet	0.0826428	0.987496	0.0742038
ComBat	0.0669755	0.989232	0.00772222
limma	0.0652302	0.987843	4.94949e-07
Raw	0.0652301	0.968193	0
scMerge	0.515512	0.967479	0
kBET_Dataset 2
methods	0.05	0.1	0.15	0.2	0.25	median_val
Harmony	0.591	0.707	0.763	0.71	0.765	0.71
LIGER	0.495	0.525	0.615	0.659	0.667	0.615
scGen	0.49	0.551	0.595	0.549	0.458	0.549
Seurat_3	0.374	0.482	0.442	0.338	0.431	0.431
scMerge	0.429	0.429	0.417	0.442	0.447	0.429
MNN_Correct	0.173	0.312	0.333	0.333	0.318	0.318
Scanorama	0.293	0.265	0.26	0.169	0.177	0.26
MMD-ResNet	0.22	0.215	0.242	0.247	0.232	0.232
fastMNN	0.22	0.265	0.232	0.222	0.104	0.222
limma	0.073	0.152	0.202	0.247	0.205	0.202
ZINB-WaVE	0.129	0.162	0.194	0.215	0.222	0.194
ComBat	0.141	0.309	0.116	0.013	0.003	0.116
Seurat_2	0.379	0.254	0.03	0.008	0	0.03
Raw	0.005	0.01	0.01	0.013	0.021	0.01
ARI_Dataset 4
Method	1 - ARI batch	ARI cell type	fscore
ComBat	0.893303	0.416448	0.736052
fastMNN	0.908796	0.407488	0.7446
Harmony	0.97814	0.463506	0.865035
LIGER	0.979694	0.392926	0.793749
limma	0.865565	0.354546	0.652525
MMD-ResNet	0.865443	0.285715	0.58546
MNN_Correct	0.919592	0.441001	0.785625
Raw	0.575056	-0.0387818	NA
Scanorama	0.915836	0.416153	0.759629
scGen	0.981797	0.478991	0.883316
scMerge	0.954997	0.435218	0.815899
Seurat_2	0.939831	0.378981	0.746053
Seurat_3	0.985421	0.5617	0.960438
ZINB-WaVE	0.90305	0.61117	0.888439
ASW_Dataset 4
Methods	1 - ASW batch	ASW cell type	fscore
ComBat	1.04083	0.172701	0.595439
fastMNN	0.973841	0.131783	0.329687
Harmony	1.04082	0.31807	0.627395
LIGER	1.00084	0.163052	0.452137
limma	1.05697	0.316492	0.680448
MMD-ResNet	1.01581	-0.0245912	0.469742
MNN Correct	1.02578	0.15555	0.542791
Raw	0.920318	-0.736389	0
Scanorama	1.03405	0.393036	0.616792
scGen	1.0617	0.294337	0.689689
scMerge	1.06853	0.215931	0.688019
Seurat 2	0.990677	0.0210576	0.390915
Seurat 3	1.03698	0.284358	0.607379
ZINB-WaVE	1.17538	-0.476798	0.373776
LISI_Dataset 4
Methods	iLISI median norm	1 - cLISI median norm	fscore
Seurat_3	0.380663	0.989067	0.999989
scMerge	0.302147	0.989067	0.878853
scGen	0.203928	0.989067	0.67862
LIGER	0.273577	0.988738	0.664408
Harmony	0.180652	0.989067	0.620218
MNN_Correct	0.0772108	0.989067	0.282969
Scanorama	0.0609646	0.989067	0.214423
fastMNN	0.0454432	0.989067	0.143621
Seurat_2	0.0466646	0.98844	0.126328
ComBat	0.0235266	0.989067	0.0335181
MMD-ResNet	0.0178744	0.989067	0.00297167
limma	0.0173338	0.989067	1.62996e-07
Raw	0.0173337	0.988558	0
ZINB-WaVE	0.0559012	0.988183	0
kBET_Dataset 4
methods	0.05	0.1	0.15	0.2	0.25	median_val
LIGER	0.299	0.259	0.268	0.341	0.476	0.299
Seurat_3	0.226	0.171	0.195	0.22	0.274	0.22
Harmony	0.104	0.098	0.091	0.076	0.091	0.091
scGen	0.165	0.073	0.055	0.037	0.043	0.055
scMerge	0.11	0.061	0.049	0.049	0.049	0.049
fastMNN	0.049	0.012	0.024	0.03	0.043	0.03
Seurat_2	0.043	0.018	0.018	0.012	0.012	0.018
limma	0.049	0	0	0.006	0.024	0.006
Scanorama	0.049	0.006	0	0.006	0.018	0.006
ZINB-WaVE	0.012	0.006	0	0.006	0.006	0.006
ComBat	0.006	0	0	0	0.006	0
MMD-ResNet	0	0	0	0	0	0
MNN_Correct	0.037	0	0	0	0	0
Raw	0	0	0	0	0	0
ARI_Dataset 5
Method	1 - ARI batch	ARI cell type	fscore
ComBat	0.993688	0.557709	0.856806
fastMNN	0.991382	0.638921	0.959427
Harmony	0.996208	0.663258	0.997669
LIGER	0.99394	0.524015	0.805617
limma	0.931363	0.537417	0.717391
MMD-ResNet	0.997316	0.511391	0.789494
MNN_Correct	0.994277	0.63015	0.954668
Raw	0.759162	0.226607	NA
Scanorama	0.974552	0.548907	0.812849
scGen	0.992154	0.474656	0.718779
scMerge	0.968604	0.566908	0.826371
Seurat_2	0.995985	0.573548	0.883315
Seurat_3	0.994955	0.636857	0.96415
ZINB-WaVE	0.954729	0.556514	0.786994
ASW_Dataset 5
Methods	1 - ASW batch	ASW cell type	fscore
ComBat	0.982489	0.229619	0.827875
fastMNN	0.981236	0.288443	0.916932
Harmony	0.99206	0.323083	0.988149
LIGER	0.993726	0.205747	0.802133
limma	0.969416	0.222297	0.792843
MMD-ResNet	0.996452	0.223443	0.839575
MNN Correct	0.992941	0.305999	0.966499
Raw	0.767371	-0.0402937	0
Scanorama	0.977057	0.218519	0.799593
scGen	0.984491	0.177632	0.733374
scMerge	0.982763	0.174458	0.724568
Seurat 2	0.99745	0.147877	0.682337
Seurat 3	0.99047	0.322602	0.983956
ZINB-WaVE	0.98356	0.104407	0.559366
LISI_Dataset 5
Methods	iLISI median norm	1 - cLISI median norm	fscore
LIGER	0.90842	0.982601	0.996966
Seurat_2	0.835998	0.982524	0.95194
Seurat_3	0.811978	0.98308	0.939375
Harmony	0.730889	0.98308	0.882406
MMD-ResNet	0.661999	0.980562	0.817852
fastMNN	0.620539	0.98308	0.794275
scGen	0.58615	0.980304	0.753459
scMerge	0.529768	0.974616	0.6817
MNN_Correct	0.462591	0.982121	0.638361
ZINB-WaVE	0.373582	0.96736	0.502597
Scanorama	0.15826	0.978969	0.198381
ComBat	0.0822162	0.981131	0.0404233
limma	0.0648045	0.981775	0
Raw	0.0648045	0.903768	NA
kBET_Dataset 5
methods	0.05	0.1	0.15	0.2	0.25	median_val
LIGER	0.698	0.646	0.659	0.587	0.625	0.646
Seurat_2	0.581	0.611	0.596	0.627	0.631	0.611
Seurat_3	0.43	0.509	0.398	0.343	0.327	0.398
Harmony	0.272	0.253	0.326	0.328	0.341	0.326
MMD-ResNet	0.282	0.247	0.256	0.342	0.301	0.282
fastMNN	0.21	0.236	0.281	0.293	0.38	0.281
scGen	0.235	0.294	0.343	0.136	0.269	0.269
scMerge	0.183	0.163	0.228	0.249	0.357	0.228
Scanorama	0.122	0.127	0.207	0.161	0.317	0.161
ZINB-WaVE	0.129	0.121	0.136	0.162	0.201	0.136
MNN_Correct	0.134	0.106	0.148	0.078	0.545	0.134
ComBat	0.095	0.114	0.194	0.131	0.301	0.131
limma	0.05	0.052	0.126	0.063	0.182	0.063
Raw	0.005	0.006	0.009	0.011	0.011	0.009
ARI_Dataset 6
Method	1 - ARI batch	ARI cell type	fscore
ComBat	0.656113	0.14203	0.114736
fastMNN	0.50274	0.0942929	0.00213409
Harmony	0.99457	0.986145	0.979808
LIGER	0.817669	0.202213	0.224253
limma	0.888479	0.0925162	0.0322059
MMD-ResNet	0.992791	0.077553	0
MNN_Correct	0.50216	0.0946179	0
Raw	0.996126	0.0908691	0.0288482
Scanorama	0.999492	0.986926	0.985193
scGen	0.996155	0.985884	0.981275
scMerge	0.99293	0.983281	0.976631
Seurat_2	0.997515	0.125457	0.099912
Seurat_3	1.01444	0.698703	0.811683
ZINB-WaVE	0.992494	0.979643	0.974263
ASW_Dataset 6
Methods	1 - ASW batch	ASW cell type	fscore
ComBat	0.777358	0.0834493	0.146337
fastMNN	0.76365	0.0897023	0.150899
Harmony	0.985716	0.594193	0.99551
LIGER	0.923067	0.0745617	0.148032
limma	0.860658	0.0554605	0.0885858
MMD-ResNet	0.922865	0.229311	0.488261
MNN Correct	0.689693	0.0907781	0
Raw	0.901854	0.262813	0.52344
Scanorama	0.940639	0.464006	0.803516
scGen	0.977833	0.396091	0.776628
scMerge	0.988386	0.402654	0.796292
Seurat 2	0.9836	0.0282928	0
Seurat 3	0.834199	0.33414	0.51056
ZINB-WaVE	0.975981	0.127556	0.296544
LISI_Dataset 6
Methods	iLISI median norm	1 - cLISI median norm	fscore
ComBat	0.0652361	0.901126	0
fastMNN	0.0652362	0.930877	3.26313e-07
Harmony	0.695722	0.934764	0.960034
LIGER	0.656235	0.520566	0
limma	0.0684528	0.871052	0.00936761
MMD-ResNet	0.172756	0.934764	0.272029
MNN_Correct	0.0652361	0.883327	0
Raw	0.0891578	0.934764	0.0676806
Scanorama	0.562999	0.934764	0.843135
scGen	0.71283	0.934764	0.973405
scMerge	0.748216	0.934764	1
Seurat_2	0.554061	0.826363	0.72683
Seurat_3	0.259643	0.934764	0.44315
ZINB-WaVE	0.442489	0.934764	0.711642
kBET_Dataset 6
methods	0.05	0.1	0.15	0.2	0.25	median_val
Harmony	0.891	0.855	0.814	0.734	0.699	0.814
Scanorama	0.668	0.636	0.618	0.595	0.609	0.618
ZINB.WaVE	0.523	0.489	0.474	0.469	0.497	0.489
scGen	0.654	0.517	0.447	0.41	0.46	0.46
scMerge	0.505	0.396	0.327	0.285	0.269	0.327
Seurat_2	0.305	0.288	0.291	0.283	0.298	0.291
MMD.ResNet	0.349	0.302	0.288	0.274	0.279	0.288
fastMNN	0.444	0.334	0.275	0.24	0.257	0.275
Raw	0.296	0.262	0.24	0.235	0.255	0.255
MNN_Correct	0.069	0.062	0.058	0.057	0.061	0.061
limma	0.017	0.016	0.02	0.02	0.023	0.02
LIGER	0.011	0.009	0.008	0.006	0.008	0.008
Seurat_3	0.003	0.005	0.005	0.003	0.003	0.003
ComBat	0.002	0.002	0.003	0.002	0.003	0.002
ARI_Dataset 7
Method	1 - ARI batch	ARI cell type	fscore
ComBat	0.81544	0.335264	0.211454
fastMNN	0.846059	0.366014	0.419562
Harmony	0.859129	0.374828	0.495941
LIGER	0.919457	0.239105	0.564679
limma	0.834969	0.256351	0.314253
MMD-ResNet	0.993303	0.077881	0
MNN_Correct	0.878971	0.304556	0.54103
Raw	0.790825	0.383959	0
Scanorama	0.894421	0.259953	0.540991
scGen	0.889155	0.286779	0.558995
scMerge	0.89608	0.216164	0.474171
Seurat_2	0.877608	0.272904	0.505067
Seurat_3	0.824156	0.39513	0.282697
ZINB-WaVE	0.89475	0.271769	0.55795
ASW_Dataset 7
Methods	1 - ASW batch	ASW cell type	fscore
ComBat	0.960779	0.151768	0.54639
fastMNN	0.819791	0.334588	0.267147
Harmony	0.841251	0.335083	0.400619
LIGER	0.89706	0.0915386	0.341052
limma	0.96738	0.103737	0.426988
MMD-ResNet	0.997456	-0.00646167	0
MNN Correct	0.867613	0.267843	0.498062
Raw	0.851901	0.158101	0.35817
Scanorama	0.815253	0.116026	0.190117
scGen	0.794805	0.164352	0.0716468
scMerge	0.946942	0.0394024	0.204774
Seurat 2	0.953863	0.022527	0.136681
Seurat 3	0.786582	0.381175	0
ZINB-WaVE	0.959556	0.0168702	0.112151
LISI_Dataset 7
Methods	iLISI median norm	1 - cLISI median norm	fscore
LIGER	0.221108	0.989375	0.987513
MNN_Correct	0.199474	0.98941	0.916575
scMerge	0.197119	0.987021	0.840037
ZINB-WaVE	0.204885	0.984356	0.767363
fastMNN	0.14031	0.989781	0.655678
scGen	0.0929287	0.989781	0.315561
Scanorama	0.0890672	0.989781	0.280098
Harmony	0.0841582	0.989781	0.2328
Raw	0.0757924	0.989781	0.145907
Seurat_2	0.0743663	0.989332	0.129997
Seurat_3	0.0736537	0.989781	0.122304
ComBat	0.06338	0.989781	0
limma	0.06338	0.989781	0
MMD-ResNet	0.164756	0.973323	0
kBET_Dataset 7
methods	0.05	0.1	0.15	0.2	0.25	median_val
scMerge	0.54	0.511	0.549	0.61	0.623	0.549
LIGER	0.519	0.498	0.486	0.306	0.244	0.486
scGen	0.485	0.481	0.432	0.461	0.469	0.469
Scanorama	0.324	0.389	0.435	0.407	0.346	0.389
fastMNN	0.485	0.448	0.352	0.373	0.222	0.373
MNN_Correct	0.352	0.349	0.34	0.491	0.491	0.352
MMD-ResNet	0.262	0.315	0.318	0.332	0.401	0.318
Harmony	0.361	0.302	0.248	0.373	0.309	0.309
Raw	0.313	0.343	0.306	0.231	0.201	0.306
ZINB-WaVE	0.33	0.302	0.309	0.293	0.114	0.302
Seurat_3	0.273	0.204	0.173	0.213	0.079	0.204
Seurat_2	0.213	0.262	0.164	0.114	0.09	0.164
ComBat	0.019	0.019	0.015	0.191	0.034	0.019
limma	0.012	0.009	0.009	0.059	0.009	0.009
ARI_Dataset 8
Method	1 - ARI batch	ARI cell type	fscore
ComBat	0.985493	0.211814	0.843259
fastMNN	0.998669	0.0647142	0.0756138
Harmony	0.980072	0.232286	0.879512
LIGER	0.990349	0.245	0.944751
limma	0.844091	0.140339	0
MMD-ResNet	1.0004	0.177262	0.764654
MNN_Correct	1.00183	0.057253	0
Raw	0.961718	0.0581937	0.0098592
Scanorama	0.952391	0.163763	0.61067
scGen	1.00606	0.246786	1
scMerge	1.00064	0.0731928	0.154736
Seurat_2	0.991548	0.157117	0.667477
Seurat_3	0.991377	0.207864	0.848124
ZINB-WaVE	0.976162	0.164031	0.666352
ASW_Dataset 8
Methods	1 - ASW batch	ASW cell type	fscore
ComBat	1.07022	-0.031769	0.555424
fastMNN	1.00383	-0.193896	0.26198
Harmony	0.956412	0.387609	0.214349
LIGER	0.937262	0.318335	0
limma	1.07481	-0.331116	0
MMD-ResNet	1.03124	-0.104552	0.410697
MNN Correct	1.02855	-0.219126	0.244939
Raw	1.09679	-0.292353	0.102348
Scanorama	1.03254	0.140274	0.62518
scGen	1.06102	0.0306656	0.610566
scMerge	1.01671	-0.0257427	0.458551
Seurat 2	0.979155	-0.0356626	0.32048
Seurat 3	1.05338	0.189625	0.726215
ZINB-WaVE	1.08699	-0.0182455	0.594765
LISI_Dataset 8
Methods	iLISI median norm	1 - cLISI median norm	fscore
LIGER	0.624697	0.910737	0.862663
Harmony	0.463757	0.925427	0.768051
Seurat_3	0.419792	0.929749	0.726936
Seurat_2	0.652632	0.858534	0.618443
Scanorama	0.305354	0.923473	0.557252
MNN_Correct	0.275356	0.889612	0.462309
ZINB-WaVE	0.23408	0.848729	0.329288
fastMNN	0.0946947	0.931469	0.0974569
scGen	0.0644365	0.941078	3.7922e-07
ComBat	0.0644364	0.943177	0
limma	0.0644364	0.938368	0
MMD-ResNet	0.0644364	0.933176	0
Raw	0.0644364	0.93318	0
scMerge	0.0644364	0.789937	NA
kBET_Dataset 8
methods	0.05	0.1	0.15	0.2	0.25	median_val
fastMNN	0.971	0.991	0.996	1	1	0.996
scMerge	0.956	0.977	0.988	0.991	0.995	0.988
MNN_Correct	0.936	0.958	0.972	0.98	0.988	0.972
Seurat_2	0.177	0.186	0.22	0.223	0.231	0.22
MMD-ResNet	0.3	0.239	0.204	0.163	0.121	0.204
scGen	0.191	0.263	0.271	0.163	0.121	0.191
Seurat_3	0.151	0.134	0.265	0.182	0.152	0.152
Harmony	0.137	0.078	0.088	0.083	0.068	0.083
ComBat	0.053	0.066	0.058	0.066	0.062	0.062
LIGER	0.161	0.048	0.03	0.041	0.059	0.048
Scanorama	0.027	0.018	0.028	0.028	0.032	0.028
Raw	0.011	0.016	0.025	0.032	0.043	0.025
limma	0.002	0	0.002	0	0.002	0.002
ZINB-WaVE	0.087	0.021	0.002	0	0	0.002
ARI_Dataset 9
Method	1 - ARI batch
ComBat	0.996039
fastMNN	0.988
Harmony	0.997696
LIGER	0.998912
limma	1.00039
MMD-ResNet	0.995152
MNN_Correct	0.997717
Raw	1.00055
Scanorama	0.934123
scGen	0.98966
scMerge	0.553387
Seurat_2	0.977064
Seurat_3	0.990644
ZINB-WaVE	0.976934
ASW_Dataset 9
Methods	1 - ASW batch
ComBat	0.995298
fastMNN	0.968543
Harmony	0.985806
LIGER	0.983733
limma	0.887586
MMD-ResNet	0.982299
MNN Correct	0.983371
Raw	0.976781
Scanorama	0.921158
scGen	0.982747
scMerge	0.920027
Seurat 2	0.992439
Seurat 3	0.974078
ZINB-WaVE	0.993085
LISI_Dataset 9
Methods	iLISI median norm
ZINB-WaVE	0.622643
LIGER	0.546734
Harmony	0.480134
MMD-ResNet	0.471189
Seurat_3	0.455812
Seurat_2	0.289925
MNN_Correct	0.259385
scGen	0.229974
ComBat	0.224287
fastMNN	0.178418
Raw	0.155306
scMerge	0.0735606
Scanorama	0.0705134
limma	0.0644439
kBET_Dataset 9
methods	0.05	0.1	0.15	0.2	0.25	median_val
MMD-ResNet	0.288	0.261	0.247	0.313	0.312	0.288
Seurat_2	0.215	0.182	0.202	0.217	0.233	0.215
LIGER	0.183	0.167	0.218	0.122	0.101	0.167
ZINB-WaVE	0.156	0.184	0.165	0.154	0.172	0.165
Seurat_3	0.171	0.15	0.145	0.053	0.037	0.145
MNN_Correct	0.112	0.097	0.127	0.163	0.237	0.127
ComBat	0.114	0.1	0.117	0.229	0.158	0.117
scGen	0.106	0.092	0.141	0.208	0.115	0.115
fastMNN	0.088	0.092	0.1	0.151	0.178	0.1
Raw	0.078	0.074	0.1	0.115	0.108	0.1
Harmony	0.069	0.059	0.068	0.086	0.075	0.069
scMerge	0.033	0.034	0.038	0.042	0.044	0.038
Scanorama	0.052	0.028	0.024	0.025	0.028	0.028
limma	0.013	0.008	0.008	0.009	0.008	0.008
ARI_Dataset 10
Method	1 - ARI batch	ARI cell type	fscore
ComBat	0.922106	0.463943	0.876714
fastMNN	0.95656	0.321715	0.678418
Harmony	0.969887	0.484272	0.929136
LIGER	0.986229	0.409928	0.837188
limma	0.900137	0.435755	0.829468
MMD-ResNet	0.196326	0.0886401	NA
MNN_Correct	0.959124	0.396968	0.805556
Raw	0.196326	0.0886401	NA
Scanorama	0.965217	0.461318	0.897873
scGen	0.965851	0.529573	0.978724
scMerge	0.711893	0.260162	0.484474
Seurat_2	0.999308	0.267174	0.576412
Seurat_3	0.983849	0.41704	0.846632
ZINB-WaVE	0.919681	0.453228	0.862261
ASW_Dataset 10
Methods	1 - ASW batch	ASW cell type	fscore
ComBat	0.799001	0.151575	0.787355
fastMNN	0.934061	0.094753	0.782988
Harmony	0.959869	0.188248	0.961528
LIGER	0.930209	0.145559	0.873711
limma	0.971857	0.140742	0.890954
MMD-ResNet	0.286405	-0.131132	0
MNN Correct	0.911114	0.164928	0.891617
Raw	0.286439	-0.128423	9.7624e-05
Scanorama	0.982527	0.203061	1
scGen	0.702442	0.166341	0.715138
scMerge	0.506522	-0.0617676	0.250612
Seurat 2	0.976004	-0.00417183	0.54919
Seurat 3	0.973533	0.147695	0.904299
ZINB-WaVE	0.959981	-0.0285925	0.465914
LISI_Dataset 10
Methods	iLISI median norm	1 - cLISI median norm	fscore
LIGER	0.624697	0.910737	0.862663
Harmony	0.463757	0.925427	0.768051
Seurat_3	0.419792	0.929749	0.726936
Seurat_2	0.652632	0.858534	0.618443
Scanorama	0.305354	0.923473	0.557252
MNN_Correct	0.275356	0.889612	0.462309
ZINB-WaVE	0.23408	0.848729	0.329288
fastMNN	0.0946947	0.931469	0.0974569
scGen	0.0644365	0.941078	3.7922e-07
ComBat	0.0644364	0.943177	0
limma	0.0644364	0.938368	0
MMD-ResNet	0.0644364	0.933176	0
Raw	0.0644364	0.93318	0
scMerge	0.0644364	0.789937	NA
kBET_Dataset 10
methods	0.05	0.1	0.15	0.2	0.25	median_val
LIGER	0.779	0.656	0.617	0.61	0.417	0.617
Seurat_2	0.552	0.577	0.626	0.601	0.546	0.577
Harmony	0.543	0.454	0.528	0.589	0.497	0.528
Seurat_3	0.454	0.396	0.399	0.485	0.479	0.454
Scanorama	0.429	0.454	0.417	0.534	0.429	0.429
scGen	0.172	0.19	0.264	0.261	0.215	0.215
MNN_Correct	0.153	0.166	0.147	0.166	0.221	0.166
ZINB-WaVE	0.156	0.16	0.166	0.181	0.178	0.166
fastMNN	0.098	0.123	0.129	0.147	0.166	0.129
limma	0.061	0.141	0.123	0.123	0.117	0.123
ComBat	0.104	0.123	0.135	0.092	0.067	0.104
scMerge	0.086	0.055	0.025	0.006	0	0.025
Raw	0	0.006	0.012	0.018	0.018	0.012
MMD-ResNet	0	0	0.006	0.018	0.018	0.006
