# Supplementary material for: A benchmark of batch-effect correction methods for single-cell RNA sequencing data
Source: Genome Biol. 2020 Jan 16;21:12. doi: 10.1186/s13059-019-1850-9 (PMC6964114; doi:10.1186/s13059-019-1850-9)
Supplement: Supplementary file 6 — Additional file 6: Table S5. Evaluation statistical test. Statistical significance test results of the batch correction method’s assessment metric scores. [file 13059_2019_1850_MOESM6_ESM.xlsx]

## Sheet: Sheet1
Table S5: Evaluation statistical test with Wilcoxon statistical test with Benjamini and Hochberg correction
ARI batch dataset 1
	Raw	Seurat_2	Seurat_3	Harmony	fastMNN	MNN_Correct	ComBat	limma	scGen	Scanorama	MMD-ResNet	ZINB-WaVE	scMerge
Seurat_2	0.019
Seurat_3	0.034	0.724
Harmony	0.053	0.485	0.724
fastMNN	0.252	0.292	0.516	0.625
MNN_Correct	0.006	0.57	0.762	0.887	0.412
ComBat	0.445	0.339	0.339	0.485	0.717	0.274
limma	0.625	0.026	0.079	0.2	0.461	0.197	0.583
scGen	0.99	0.017	0.019	0.024	0.143	0.005	0.336	0.749
Scanorama	0.911	0.045	0.083	0.113	0.283	0.078	0.336	0.923	0.979
MMD-ResNet	1	0.019	0.034	0.053	0.252	0.006	0.445	0.625	0.99	0.911
ZINB-WaVE	<0.001	<0.001	<0.001	<0.001	<0.001	<0.001	<0.001	<0.001	<0.001	<0.001	<0.001
scMerge	0.18	0.349	0.461	0.724	1	0.442	0.749	0.457	0.18	0.301	0.18	<0.001
LIGER	0.625	0.01	0.016	0.014	0.065	0.001	0.2	0.704	0.724	0.99	0.625	<0.001	0.079
ARI cell type dataset 1
	Raw	Seurat_2	Seurat_3	Harmony	fastMNN	MNN_Correct	ComBat	limma	scGen	Scanorama	MMD-ResNet	ZINB-WaVE	scMerge
Seurat_2	0.011
Seurat_3	0.036	1
Harmony	0.489	0.494	0.856
fastMNN	0.282	<0.001	<0.001	0.167
MNN_Correct	0.005	0.465	0.957	0.37	<0.001
ComBat	0.012	1	0.765	0.134	<0.001	0.957
limma	0.145	0.011	0.024	0.506	0.349	0.007	0.018
scGen	0.01	0.762	0.212	0.134	<0.001	0.844	0.89	0.011
Scanorama	0.177	0.022	0.012	0.494	0.08	0.006	0.058	0.184	0.005
MMD-ResNet	1	0.011	0.036	0.489	0.282	0.005	0.012	0.145	0.01	0.177
ZINB-WaVE	<0.001	<0.001	<0.001	<0.001	<0.001	<0.001	<0.001	<0.001	<0.001	<0.001	<0.001
scMerge	0.454	0.002	0.01	0.243	0.765	0.002	0.002	0.381	<0.001	0.16	0.454	<0.001
LIGER	<0.001	0.264	0.025	0.015	0.014	0.37	0.173	0.01	0.131	0.008	<0.001	<0.001	<0.001
ASW batch dataset 1
	Raw	Seurat_2	Seurat_3	Harmony	fastMNN	MNN_Correct	ComBat	limma	scGen	Scanorama	MMD-ResNet	ZINB-WaVE	scMerge
Seurat_2	<0.001
Seurat_3	<0.001	<0.001
Harmony	<0.001	<0.001	<0.001
fastMNN	<0.001	<0.001	<0.001	<0.001
MNN_Correct	<0.001	<0.001	0.055	<0.001	<0.001
ComBat	<0.001	<0.001	<0.001	0.026	<0.001	<0.001
limma	<0.001	<0.001	<0.001	<0.001	<0.001	<0.001	<0.001
scGen	<0.001	<0.001	<0.001	<0.001	<0.001	<0.001	<0.001	0.001
Scanorama	<0.001	<0.001	0.904	<0.001	<0.001	0.025	<0.001	<0.001	<0.001
MMD-ResNet	0.787	<0.001	<0.001	<0.001	<0.001	<0.001	<0.001	<0.001	<0.001	<0.001
ZINB-WaVE	<0.001	<0.001	<0.001	<0.001	<0.001	<0.001	<0.001	<0.001	<0.001	<0.001	<0.001
scMerge	<0.001	<0.001	0.262	<0.001	<0.001	0.295	<0.001	<0.001	<0.001	0.156	<0.001	<0.001
LIGER	<0.001	<0.001	<0.001	<0.001	<0.001	<0.001	<0.001	<0.001	<0.001	<0.001	<0.001	<0.001	<0.001
ASW cell type dataset 1
	Raw	Seurat_2	Seurat_3	Harmony	fastMNN	MNN_Correct	ComBat	limma	scGen	Scanorama	MMD-ResNet	ZINB-WaVE	scMerge
Seurat_2	<0.001
Seurat_3	<0.001	<0.001
Harmony	<0.001	<0.001	<0.001
fastMNN	<0.001	<0.001	<0.001	<0.001
MNN_Correct	<0.001	<0.001	<0.001	<0.001	<0.001
ComBat	<0.001	<0.001	<0.001	<0.001	<0.001	<0.001
limma	<0.001	<0.001	<0.001	0.133	<0.001	<0.001	<0.001
scGen	<0.001	<0.001	<0.001	<0.001	<0.001	0.578	<0.001	<0.001
Scanorama	<0.001	<0.001	<0.001	<0.001	<0.001	<0.001	<0.001	<0.001	<0.001
MMD-ResNet	0.904	<0.001	<0.001	<0.001	<0.001	<0.001	<0.001	<0.001	<0.001	<0.001
ZINB-WaVE	<0.001	<0.001	<0.001	<0.001	<0.001	<0.001	<0.001	<0.001	<0.001	<0.001	<0.001
scMerge	0.338	<0.001	<0.001	<0.001	<0.001	<0.001	<0.001	<0.001	<0.001	<0.001	0.647	<0.001
LIGER	<0.001	<0.001	<0.001	<0.001	<0.001	<0.001	<0.001	<0.001	<0.001	<0.001	<0.001	<0.001	<0.001
iLISI dataset 1
	Raw	Seurat_2	Seurat_3	Harmony	fastMNN	MNN_Correct	ComBat	limma	scGen	Scanorama	MMD-ResNet	ZINB-WaVE	scMerge
Seurat_2	<0.001
Seurat_3	<0.001	<0.001
Harmony	<0.001	<0.001	<0.001
fastMNN	<0.001	<0.001	<0.001	<0.001
MNN_Correct	<0.001	<0.001	<0.001	<0.001	<0.001
ComBat	<0.001	<0.001	<0.001	<0.001	0.06	<0.001
limma	<0.001	<0.001	<0.001	<0.001	<0.001	<0.001	<0.001
scGen	<0.001	<0.001	<0.001	<0.001	0.003	<0.001	0.226	<0.001
Scanorama	<0.001	<0.001	<0.001	0.002	<0.001	<0.001	0.035	<0.001	0.541
MMD-ResNet	0.953	<0.001	<0.001	<0.001	<0.001	<0.001	<0.001	<0.001	<0.001	<0.001
ZINB-WaVE	<0.001	<0.001	<0.001	<0.001	<0.001	0.002	<0.001	0.606	<0.001	<0.001	<0.001
scMerge	<0.001	<0.001	<0.001	0.003	<0.001	<0.001	0.021	<0.001	0.379	0.855	<0.001	<0.001
LIGER	<0.001	0.008	<0.001	<0.001	0.002	<0.001	<0.001	<0.001	<0.001	<0.001	<0.001	<0.001	<0.001
cLISI dataset 1
	Raw	Seurat_2	Seurat_3	Harmony	fastMNN	MNN_Correct	ComBat	limma	scGen	Scanorama	MMD-ResNet	ZINB-WaVE	scMerge
Seurat_2	<0.001
Seurat_3	<0.001	<0.001
Harmony	<0.001	<0.001	<0.001
fastMNN	0.042	<0.001	<0.001	0.007
MNN_Correct	0.048	<0.001	<0.001	0.002	0.994
ComBat	0.46	<0.001	<0.001	<0.001	0.347	0.347
limma	0.004	<0.001	<0.001	0.003	0.185	0.216	0.036
scGen	<0.001	<0.001	<0.001	0.004	0.674	0.46	0.01	0.641
Scanorama	0.994	<0.001	<0.001	<0.001	0.156	0.111	0.537	0.002	0.007
MMD-ResNet	0.994	<0.001	<0.001	<0.001	0.039	0.045	0.457	0.004	<0.001	0.994
ZINB-WaVE	<0.001	0.216	<0.001	<0.001	<0.001	<0.001	<0.001	<0.001	<0.001	<0.001	<0.001
scMerge	<0.001	<0.001	<0.001	0.917	0.001	<0.001	<0.001	0.002	0.015	<0.001	<0.001	<0.001
LIGER	<0.001	<0.001	<0.001	0.056	0.319	0.376	0.002	0.897	0.207	0.002	<0.001	<0.001	0.066
kBET dataset 1
	Raw	Seurat_2	Seurat_3	Harmony	fastMNN	MNN_Correct	ComBat	limma	scGen	Scanorama	MMD-ResNet	ZINB-WaVE	scMerge
Seurat_2	<0.001
Seurat_3	<0.001	<0.001
Harmony	<0.001	<0.001	<0.001
fastMNN	<0.001	<0.001	<0.001	<0.001
MNN_Correct	<0.001	<0.001	<0.001	<0.001	<0.001
ComBat	<0.001	<0.001	<0.001	<0.001	<0.001	<0.001
limma	<0.001	<0.001	<0.001	<0.001	<0.001	<0.001	<0.001
scGen	<0.001	<0.001	<0.001	<0.001	<0.001	<0.001	<0.001	<0.001
Scanorama	<0.001	<0.001	<0.001	<0.001	<0.001	<0.001	<0.001	<0.001	<0.001
MMD-ResNet	0.392	<0.001	<0.001	<0.001	<0.001	<0.001	<0.001	<0.001	<0.001	<0.001
ZINB-WaVE	<0.001	<0.001	<0.001	<0.001	<0.001	<0.001	<0.001	<0.001	<0.001	<0.001	<0.001
scMerge	<0.001	<0.001	<0.001	<0.001	<0.001	<0.001	<0.001	<0.001	<0.001	<0.001	<0.001	<0.001
LIGER	<0.001	<0.001	<0.001	<0.001	<0.001	<0.001	<0.001	<0.001	<0.001	<0.001	<0.001	<0.001	<0.001
ARI batch dataset 2
	Raw	Seurat_2	Seurat_3	Harmony	fastMNN	MNN_Correct	ComBat	limma	scGen	Scanorama	MMD-ResNet	ZINB-WaVE	scMerge
Seurat_2	<0.001
Seurat_3	<0.001	<0.001
Harmony	<0.001	<0.001	<0.001
fastMNN	<0.001	<0.001	<0.001	0.019
MNN_Correct	<0.001	0.093	<0.001	0.346	0.002
ComBat	<0.001	<0.001	<0.001	<0.001	0.004	<0.001
limma	<0.001	<0.001	<0.001	0.674	0.356	0.122	0.008
scGen	<0.001	<0.001	<0.001	<0.001	<0.001	<0.001	<0.001	<0.001
Scanorama	<0.001	<0.001	<0.001	<0.001	<0.001	<0.001	0.027	<0.001	<0.001
MMD-ResNet	<0.001	<0.001	0.808	<0.001	<0.001	<0.001	<0.001	<0.001	<0.001	<0.001
ZINB-WaVE	<0.001	<0.001	<0.001	<0.001	<0.001	<0.001	<0.001	<0.001	0.947	0.001	<0.001
scMerge	<0.001	0.006	<0.001	0.007	<0.001	0.622	<0.001	0.02	<0.001	<0.001	<0.001	<0.001
LIGER	<0.001	0.061	0.004	<0.001	<0.001	<0.001	<0.001	<0.001	<0.001	<0.001	0.002	<0.001	<0.001
ARI cell type dataset 2
	Raw	Seurat_2	Seurat_3	Harmony	fastMNN	MNN_Correct	ComBat	limma	scGen	Scanorama	MMD-ResNet	ZINB-WaVE	scMerge
Seurat_2	<0.001
Seurat_3	<0.001	0.33
Harmony	<0.001	<0.001	<0.001
fastMNN	<0.001	<0.001	0.002	<0.001
MNN_Correct	<0.001	0.003	0.079	<0.001	0.263
ComBat	<0.001	<0.001	0.014	<0.001	0.294	0.904
limma	<0.001	0.796	0.617	<0.001	<0.001	0.001	<0.001
scGen	<0.001	0.075	<0.001	<0.001	<0.001	<0.001	<0.001	<0.001
Scanorama	<0.001	0.243	0.585	<0.001	<0.001	0.014	0.001	0.046	<0.001
MMD-ResNet	<0.001	0.035	<0.001	<0.001	<0.001	<0.001	<0.001	<0.001	0.893	<0.001
ZINB-WaVE	<0.001	0.071	0.294	<0.001	<0.001	0.025	0.002	0.01	<0.001	0.722	<0.001
scMerge	<0.001	<0.001	0.013	<0.001	0.071	0.629	0.431	<0.001	<0.001	<0.001	<0.001	0.002
LIGER	<0.001	<0.001	<0.001	<0.001	<0.001	<0.001	<0.001	<0.001	0.008	<0.001	0.013	<0.001	<0.001
ASW batch dataset 2
	Raw	Seurat_2	Seurat_3	Harmony	fastMNN	MNN_Correct	ComBat	limma	scGen	Scanorama	MMD-ResNet	ZINB-WaVE	scMerge
Seurat_2	<0.001
Seurat_3	<0.001	<0.001
Harmony	<0.001	<0.001	<0.001
fastMNN	<0.001	<0.001	<0.001	<0.001
MNN_Correct	<0.001	<0.001	<0.001	<0.001	<0.001
ComBat	<0.001	<0.001	<0.001	<0.001	<0.001	<0.001
limma	<0.001	<0.001	<0.001	<0.001	<0.001	<0.001	<0.001
scGen	<0.001	<0.001	<0.001	<0.001	<0.001	<0.001	<0.001	<0.001
Scanorama	<0.001	<0.001	<0.001	<0.001	<0.001	<0.001	<0.001	<0.001	<0.001
MMD-ResNet	<0.001	<0.001	<0.001	<0.001	<0.001	<0.001	<0.001	<0.001	<0.001	<0.001
ZINB-WaVE	<0.001	<0.001	<0.001	<0.001	<0.001	<0.001	<0.001	<0.001	<0.001	<0.001	<0.001
scMerge	<0.001	<0.001	<0.001	<0.001	<0.001	<0.001	<0.001	<0.001	<0.001	<0.001	<0.001	<0.001
LIGER	<0.001	<0.001	<0.001	<0.001	<0.001	0.678	<0.001	<0.001	<0.001	<0.001	<0.001	<0.001	<0.001
ASW cell type dataset 2
	Raw	Seurat_2	Seurat_3	Harmony	fastMNN	MNN_Correct	ComBat	limma	scGen	Scanorama	MMD-ResNet	ZINB-WaVE	scMerge
Seurat_2	<0.001
Seurat_3	<0.001	<0.001
Harmony	<0.001	<0.001	<0.001
fastMNN	<0.001	<0.001	<0.001	<0.001
MNN_Correct	<0.001	<0.001	<0.001	<0.001	<0.001
ComBat	<0.001	<0.001	<0.001	<0.001	<0.001	<0.001
limma	<0.001	<0.001	<0.001	<0.001	<0.001	<0.001	<0.001
scGen	<0.001	<0.001	<0.001	<0.001	<0.001	<0.001	<0.001	<0.001
Scanorama	<0.001	<0.001	<0.001	<0.001	<0.001	<0.001	<0.001	<0.001	<0.001
MMD-ResNet	<0.001	<0.001	<0.001	<0.001	<0.001	<0.001	<0.001	<0.001	<0.001	<0.001
ZINB-WaVE	<0.001	<0.001	<0.001	<0.001	<0.001	<0.001	<0.001	<0.001	<0.001	<0.001	<0.001
scMerge	<0.001	<0.001	<0.001	<0.001	<0.001	<0.001	<0.001	<0.001	<0.001	<0.001	<0.001	<0.001
LIGER	<0.001	<0.001	<0.001	<0.001	<0.001	<0.001	<0.001	<0.001	<0.001	<0.001	<0.001	<0.001	<0.001
iLISI dataset 2
	Raw	Seurat_2	Seurat_3	Harmony	fastMNN	MNN_Correct	ComBat	limma	scGen	Scanorama	MMD-ResNet	ZINB-WaVE	scMerge
Seurat_2	<0.001
Seurat_3	<0.001	<0.001
Harmony	<0.001	<0.001	<0.001
fastMNN	<0.001	<0.001	<0.001	<0.001
MNN_Correct	<0.001	<0.001	0.029	<0.001	<0.001
ComBat	<0.001	<0.001	<0.001	<0.001	<0.001	<0.001
limma	<0.001	<0.001	<0.001	<0.001	<0.001	<0.001	<0.001
scGen	<0.001	<0.001	<0.001	0.008	<0.001	<0.001	<0.001	<0.001
Scanorama	<0.001	<0.001	<0.001	<0.001	<0.001	<0.001	<0.001	<0.001	<0.001
MMD-ResNet	<0.001	<0.001	<0.001	<0.001	<0.001	<0.001	<0.001	<0.001	<0.001	<0.001
ZINB-WaVE	<0.001	<0.001	<0.001	<0.001	<0.001	<0.001	<0.001	<0.001	<0.001	<0.001	<0.001
scMerge	<0.001	<0.001	<0.001	<0.001	<0.001	<0.001	<0.001	<0.001	<0.001	<0.001	<0.001	<0.001
LIGER	<0.001	<0.001	<0.001	<0.001	<0.001	<0.001	<0.001	<0.001	<0.001	<0.001	<0.001	<0.001	0.015
cLISI dataset 2
	Raw	Seurat_2	Seurat_3	Harmony	fastMNN	MNN_Correct	ComBat	limma	scGen	Scanorama	MMD-ResNet	ZINB-WaVE	scMerge
Seurat_2	<0.001
Seurat_3	<0.001	<0.001
Harmony	<0.001	<0.001	<0.001
fastMNN	<0.001	<0.001	0.963	<0.001
MNN_Correct	<0.001	<0.001	<0.001	<0.001	<0.001
ComBat	<0.001	<0.001	<0.001	0.254	<0.001	<0.001
limma	<0.001	<0.001	<0.001	<0.001	<0.001	<0.001	<0.001
scGen	<0.001	<0.001	<0.001	0.256	0.001	<0.001	0.978	<0.001
Scanorama	<0.001	<0.001	<0.001	<0.001	<0.001	0.001	<0.001	<0.001	<0.001
MMD-ResNet	<0.001	0.87	<0.001	<0.001	<0.001	<0.001	<0.001	<0.001	<0.001	<0.001
ZINB-WaVE	0.021	<0.001	<0.001	<0.001	<0.001	<0.001	<0.001	<0.001	<0.001	<0.001	<0.001
scMerge	0.085	<0.001	<0.001	<0.001	<0.001	<0.001	<0.001	<0.001	<0.001	<0.001	<0.001	<0.001
LIGER	<0.001	<0.001	<0.001	<0.001	<0.001	<0.001	<0.001	<0.001	<0.001	<0.001	<0.001	<0.001	<0.001
kBET dataset 2
	Raw	Seurat_2	Seurat_3	Harmony	fastMNN	MNN_Correct	ComBat	limma	scGen	Scanorama	MMD-ResNet	ZINB-WaVE	scMerge
Seurat_2	<0.001
Seurat_3	<0.001	<0.001
Harmony	<0.001	<0.001	<0.001
fastMNN	<0.001	<0.001	<0.001	<0.001
MNN_Correct	<0.001	<0.001	<0.001	<0.001	<0.001
ComBat	<0.001	0.693	<0.001	<0.001	<0.001	<0.001
limma	<0.001	<0.001	<0.001	<0.001	<0.001	<0.001	<0.001
scGen	<0.001	<0.001	<0.001	<0.001	<0.001	<0.001	<0.001	<0.001
Scanorama	<0.001	<0.001	<0.001	<0.001	<0.001	<0.001	<0.001	<0.001	<0.001
MMD-ResNet	<0.001	<0.001	<0.001	<0.001	<0.001	<0.001	<0.001	<0.001	<0.001	0.048
ZINB-WaVE	<0.001	<0.001	<0.001	<0.001	<0.001	<0.001	<0.001	0.412	<0.001	<0.001	<0.001
scMerge	<0.001	<0.001	<0.001	<0.001	<0.001	<0.001	<0.001	<0.001	<0.001	<0.001	<0.001	<0.001
LIGER	<0.001	<0.001	<0.001	<0.001	<0.001	<0.001	<0.001	<0.001	<0.001	<0.001	<0.001	<0.001	<0.001
ARI batch dataset 4
	Raw	Seurat_2	Seurat_3	Harmony	fastMNN	MNN_Correct	ComBat	limma	scGen	Scanorama	MMD-ResNet	ZINB-WaVE	scMerge
Seurat_2	<0.001
Seurat_3	<0.001	<0.001
Harmony	<0.001	<0.001	0.471
fastMNN	<0.001	<0.001	<0.001	<0.001
MNN_Correct	<0.001	<0.001	<0.001	<0.001	0.136
ComBat	<0.001	<0.001	<0.001	<0.001	0.008	<0.001
limma	<0.001	<0.001	<0.001	<0.001	<0.001	<0.001	<0.001
scGen	<0.001	<0.001	0.883	0.448	<0.001	<0.001	<0.001	<0.001
Scanorama	<0.001	0.03	<0.001	<0.001	0.149	0.565	<0.001	<0.001	<0.001
MMD-ResNet	<0.001	<0.001	<0.001	<0.001	<0.001	<0.001	<0.001	0.459	<0.001	<0.001
ZINB-WaVE	<0.001	<0.001	<0.001	<0.001	0.448	0.056	0.029	<0.001	<0.001	0.018	<0.001
scMerge	<0.001	<0.001	<0.001	0.012	<0.001	<0.001	<0.001	<0.001	<0.001	<0.001	<0.001	<0.001
LIGER	<0.001	<0.001	0.706	0.674	<0.001	<0.001	<0.001	<0.001	0.565	<0.001	<0.001	<0.001	<0.001
ARI cell type dataset 4
	Raw	Seurat_2	Seurat_3	Harmony	fastMNN	MNN_Correct	ComBat	limma	scGen	Scanorama	MMD-ResNet	ZINB-WaVE	scMerge
Seurat_2	<0.001
Seurat_3	<0.001	<0.001
Harmony	<0.001	<0.001	0.003
fastMNN	<0.001	0.02	<0.001	<0.001
MNN_Correct	<0.001	<0.001	<0.001	0.007	0.049
ComBat	<0.001	0.003	<0.001	0.001	0.494	0.186
limma	<0.001	0.168	<0.001	<0.001	<0.001	<0.001	<0.001
scGen	<0.001	<0.001	<0.001	0.612	<0.001	<0.001	<0.001	<0.001
Scanorama	<0.001	<0.001	<0.001	<0.001	0.201	0.219	0.872	<0.001	<0.001
MMD-ResNet	<0.001	<0.001	<0.001	<0.001	<0.001	<0.001	<0.001	<0.001	<0.001	<0.001
ZINB-WaVE	<0.001	0.186	0.989	0.848	0.543	0.709	0.612	0.018	0.697	0.644	<0.001
scMerge	<0.001	<0.001	<0.001	0.013	0.011	0.872	0.186	<0.001	0.002	0.122	<0.001	0.612
LIGER	<0.001	0.193	<0.001	<0.001	0.612	0.071	0.274	0.007	<0.001	0.175	<0.001	0.382	0.068
ASW batch dataset 4
	Raw	Seurat_2	Seurat_3	Harmony	fastMNN	MNN_Correct	ComBat	limma	scGen	Scanorama	MMD-ResNet	ZINB-WaVE	scMerge
Seurat_2	<0.001
Seurat_3	<0.001	<0.001
Harmony	<0.001	<0.001	<0.001
fastMNN	<0.001	<0.001	<0.001	<0.001
MNN_Correct	<0.001	<0.001	<0.001	<0.001	<0.001
ComBat	<0.001	<0.001	<0.001	0.779	<0.001	<0.001
limma	<0.001	<0.001	<0.001	<0.001	<0.001	<0.001	<0.001
scGen	<0.001	<0.001	<0.001	<0.001	<0.001	<0.001	<0.001	<0.001
Scanorama	<0.001	<0.001	<0.001	<0.001	<0.001	<0.001	<0.001	<0.001	<0.001
MMD-ResNet	<0.001	<0.001	<0.001	<0.001	<0.001	<0.001	<0.001	<0.001	<0.001	<0.001
ZINB-WaVE	<0.001	<0.001	<0.001	<0.001	<0.001	<0.001	<0.001	<0.001	<0.001	<0.001	<0.001
scMerge	<0.001	<0.001	<0.001	<0.001	<0.001	<0.001	<0.001	<0.001	<0.001	<0.001	<0.001	<0.001
LIGER	<0.001	<0.001	<0.001	<0.001	<0.001	<0.001	<0.001	<0.001	<0.001	<0.001	<0.001	<0.001	<0.001
ASW cell type dataset 4
	Raw	Seurat_2	Seurat_3	Harmony	fastMNN	MNN_Correct	ComBat	limma	scGen	Scanorama	MMD-ResNet	ZINB-WaVE	scMerge
Seurat_2	<0.001
Seurat_3	<0.001	<0.001
Harmony	<0.001	<0.001	<0.001
fastMNN	<0.001	<0.001	<0.001	<0.001
MNN_Correct	<0.001	<0.001	<0.001	<0.001	<0.001
ComBat	<0.001	<0.001	<0.001	<0.001	<0.001	<0.001
limma	<0.001	<0.001	<0.001	0.925	<0.001	<0.001	<0.001
scGen	<0.001	<0.001	<0.001	<0.001	<0.001	<0.001	<0.001	<0.001
Scanorama	<0.001	<0.001	<0.001	<0.001	<0.001	<0.001	<0.001	<0.001	<0.001
MMD-ResNet	<0.001	<0.001	<0.001	<0.001	<0.001	<0.001	<0.001	<0.001	<0.001	<0.001
ZINB-WaVE	<0.001	<0.001	<0.001	<0.001	<0.001	<0.001	<0.001	<0.001	<0.001	<0.001	<0.001
scMerge	<0.001	<0.001	<0.001	<0.001	<0.001	<0.001	<0.001	<0.001	<0.001	<0.001	<0.001	<0.001
LIGER	<0.001	<0.001	<0.001	<0.001	<0.001	<0.001	<0.001	<0.001	<0.001	<0.001	<0.001	<0.001	<0.001
iLISI dataset 4
	Raw	Seurat_2	Seurat_3	Harmony	fastMNN	MNN_Correct	ComBat	limma	scGen	Scanorama	MMD-ResNet	ZINB-WaVE	scMerge
Seurat_2	<0.001
Seurat_3	<0.001	<0.001
Harmony	<0.001	<0.001	<0.001
fastMNN	<0.001	0.001	<0.001	<0.001
MNN_Correct	<0.001	<0.001	<0.001	<0.001	<0.001
ComBat	<0.001	<0.001	<0.001	<0.001	<0.001	<0.001
limma	<0.001	<0.001	<0.001	<0.001	<0.001	<0.001	<0.001
scGen	<0.001	<0.001	<0.001	0.224	<0.001	<0.001	<0.001	<0.001
Scanorama	<0.001	<0.001	<0.001	<0.001	<0.001	0.018	<0.001	<0.001	<0.001
MMD-ResNet	<0.001	<0.001	<0.001	<0.001	<0.001	<0.001	<0.001	<0.001	<0.001	<0.001
ZINB-WaVE	<0.001	<0.001	<0.001	<0.001	<0.001	<0.001	<0.001	<0.001	<0.001	<0.001	<0.001
scMerge	<0.001	<0.001	<0.001	<0.001	<0.001	<0.001	<0.001	<0.001	<0.001	<0.001	<0.001	<0.001
LIGER	<0.001	<0.001	<0.001	<0.001	<0.001	<0.001	<0.001	<0.001	<0.001	<0.001	<0.001	<0.001	0.048
cLISI dataset 4
	Raw	Seurat_2	Seurat_3	Harmony	fastMNN	MNN_Correct	ComBat	limma	scGen	Scanorama	MMD-ResNet	ZINB-WaVE	scMerge
Seurat_2	0.236
Seurat_3	<0.001	<0.001
Harmony	<0.001	<0.001	<0.001
fastMNN	<0.001	<0.001	<0.001	<0.001
MNN_Correct	<0.001	<0.001	<0.001	<0.001	<0.001
ComBat	<0.001	<0.001	<0.001	<0.001	<0.001	<0.001
limma	<0.001	<0.001	<0.001	<0.001	0.713	<0.001	<0.001
scGen	<0.001	<0.001	<0.001	<0.001	<0.001	<0.001	<0.001	<0.001
Scanorama	<0.001	<0.001	0.84	<0.001	<0.001	<0.001	<0.001	<0.001	<0.001
MMD-ResNet	<0.001	<0.001	<0.001	<0.001	<0.001	<0.001	<0.001	<0.001	<0.001	<0.001
ZINB-WaVE	<0.001	<0.001	<0.001	<0.001	<0.001	<0.001	<0.001	<0.001	<0.001	<0.001	<0.001
scMerge	<0.001	<0.001	0.087	<0.001	<0.001	<0.001	<0.001	<0.001	<0.001	0.032	<0.001	<0.001
LIGER	0.069	0.883	<0.001	<0.001	<0.001	<0.001	<0.001	<0.001	<0.001	<0.001	<0.001	<0.001	<0.001
kBET dataset 4
	Raw	Seurat_2	Seurat_3	Harmony	fastMNN	MNN_Correct	ComBat	limma	scGen	Scanorama	MMD-ResNet	ZINB-WaVE	scMerge
Seurat_2	<0.001
Seurat_3	<0.001	<0.001
Harmony	<0.001	<0.001	<0.001
fastMNN	<0.001	<0.001	<0.001	<0.001
MNN_Correct	<0.001	<0.001	<0.001	<0.001	<0.001
ComBat	<0.001	<0.001	<0.001	<0.001	<0.001	0.427
limma	<0.001	<0.001	<0.001	<0.001	<0.001	<0.001	<0.001
scGen	<0.001	<0.001	<0.001	<0.001	<0.001	<0.001	<0.001	<0.001
Scanorama	<0.001	<0.001	<0.001	<0.001	<0.001	<0.001	<0.001	0.982	<0.001
MMD-ResNet	<0.001	<0.001	<0.001	<0.001	<0.001	<0.001	<0.001	<0.001	<0.001	<0.001
ZINB-WaVE	<0.001	<0.001	<0.001	<0.001	<0.001	<0.001	<0.001	<0.001	<0.001	<0.001	<0.001
scMerge	<0.001	<0.001	<0.001	<0.001	<0.001	<0.001	<0.001	<0.001	0.264	<0.001	<0.001	<0.001
LIGER	<0.001	<0.001	<0.001	<0.001	<0.001	<0.001	<0.001	<0.001	<0.001	<0.001	<0.001	<0.001	<0.001
ARI batch dataset 5
	Raw	Seurat_2	Seurat_3	Harmony	fastMNN	MNN_Correct	ComBat	limma	scGen	Scanorama	MMD-ResNet	ZINB-WaVE	scMerge
Seurat_2	<0.001
Seurat_3	<0.001	0.007
Harmony	<0.001	0.179	<0.001
fastMNN	<0.001	<0.001	<0.001	<0.001
MNN_Correct	<0.001	<0.001	0.106	<0.001	<0.001
ComBat	<0.001	0.019	0.482	0.002	0.541	0.541
limma	<0.001	<0.001	<0.001	<0.001	<0.001	<0.001	<0.001
scGen	<0.001	<0.001	<0.001	<0.001	0.271	<0.001	0.787	<0.001
Scanorama	<0.001	<0.001	<0.001	<0.001	0.012	<0.001	0.179	<0.001	0.022
MMD-ResNet	<0.001	<0.001	<0.001	<0.001	<0.001	<0.001	<0.001	<0.001	<0.001	<0.001
ZINB-WaVE	<0.001	<0.001	<0.001	<0.001	<0.001	<0.001	0.003	0.019	<0.001	0.002	<0.001
scMerge	<0.001	<0.001	0.003	<0.001	0.218	0.025	0.406	<0.001	0.213	0.218	<0.001	0.001
LIGER	<0.001	<0.001	0.002	<0.001	<0.001	0.205	0.82	<0.001	<0.001	<0.001	<0.001	<0.001	0.102
ARI cell type dataset 5
	Raw	Seurat_2	Seurat_3	Harmony	fastMNN	MNN_Correct	ComBat	limma	scGen	Scanorama	MMD-ResNet	ZINB-WaVE	scMerge
Seurat_2	<0.001
Seurat_3	<0.001	0.029
Harmony	<0.001	0.019	0.554
fastMNN	<0.001	0.057	0.779	0.253
MNN_Correct	<0.001	0.084	0.47	0.133	0.598
ComBat	<0.001	0.549	<0.001	<0.001	<0.001	<0.001
limma	<0.001	0.122	<0.001	<0.001	<0.001	<0.001	0.07
scGen	<0.001	<0.001	<0.001	<0.001	<0.001	<0.001	<0.001	<0.001
Scanorama	<0.001	0.366	<0.001	<0.001	<0.001	<0.001	0.554	0.244	<0.001
MMD-ResNet	<0.001	0.02	<0.001	<0.001	<0.001	<0.001	<0.001	0.063	<0.001	<0.001
ZINB-WaVE	<0.001	0.566	<0.001	<0.001	<0.001	<0.001	0.767	0.099	<0.001	0.518	0.001
scMerge	<0.001	0.755	<0.001	<0.001	<0.001	<0.001	0.459	0.02	<0.001	0.133	<0.001	0.701
LIGER	<0.001	0.044	<0.001	<0.001	<0.001	<0.001	0.07	0.61	0.021	0.122	0.356	0.06	0.014
ASW batch dataset 5
	Raw	Seurat_2	Seurat_3	Harmony	fastMNN	MNN_Correct	ComBat	limma	scGen	Scanorama	MMD-ResNet	ZINB-WaVE	scMerge
Seurat_2	<0.001
Seurat_3	<0.001	<0.001
Harmony	<0.001	<0.001	<0.001
fastMNN	<0.001	<0.001	<0.001	<0.001
MNN_Correct	<0.001	<0.001	<0.001	<0.001	<0.001
ComBat	<0.001	<0.001	<0.001	<0.001	<0.001	<0.001
limma	<0.001	<0.001	<0.001	<0.001	<0.001	<0.001	<0.001
scGen	<0.001	<0.001	<0.001	<0.001	<0.001	<0.001	<0.001	<0.001
Scanorama	<0.001	<0.001	<0.001	<0.001	<0.001	<0.001	<0.001	<0.001	<0.001
MMD-ResNet	<0.001	<0.001	<0.001	<0.001	<0.001	<0.001	<0.001	<0.001	<0.001	<0.001
ZINB-WaVE	<0.001	<0.001	<0.001	<0.001	<0.001	<0.001	<0.001	<0.001	<0.001	<0.001	<0.001
scMerge	<0.001	<0.001	<0.001	<0.001	<0.001	<0.001	0.004	<0.001	<0.001	<0.001	<0.001	<0.001
LIGER	<0.001	<0.001	<0.001	<0.001	<0.001	<0.001	<0.001	<0.001	<0.001	<0.001	<0.001	<0.001	<0.001
ASW cell type dataset 5
	Raw	Seurat_2	Seurat_3	Harmony	fastMNN	MNN_Correct	ComBat	limma	scGen	Scanorama	MMD-ResNet	ZINB-WaVE	scMerge
Seurat_2	<0.001
Seurat_3	<0.001	<0.001
Harmony	<0.001	<0.001	0.183
fastMNN	<0.001	<0.001	<0.001	<0.001
MNN_Correct	<0.001	<0.001	<0.001	<0.001	<0.001
ComBat	<0.001	<0.001	<0.001	<0.001	<0.001	<0.001
limma	<0.001	<0.001	<0.001	<0.001	<0.001	<0.001	<0.001
scGen	<0.001	<0.001	<0.001	<0.001	<0.001	<0.001	<0.001	<0.001
Scanorama	<0.001	<0.001	<0.001	<0.001	<0.001	<0.001	<0.001	<0.001	<0.001
MMD-ResNet	<0.001	<0.001	<0.001	<0.001	<0.001	<0.001	<0.001	0.073	<0.001	<0.001
ZINB-WaVE	<0.001	<0.001	<0.001	<0.001	<0.001	<0.001	<0.001	<0.001	<0.001	<0.001	<0.001
scMerge	<0.001	<0.001	<0.001	<0.001	<0.001	<0.001	<0.001	<0.001	0.013	<0.001	<0.001	<0.001
LIGER	<0.001	<0.001	<0.001	<0.001	<0.001	<0.001	<0.001	<0.001	<0.001	<0.001	<0.001	<0.001	<0.001
iLISI dataset 5
	Raw	Seurat_2	Seurat_3	Harmony	fastMNN	MNN_Correct	ComBat	limma	scGen	Scanorama	MMD-ResNet	ZINB-WaVE	scMerge
Seurat_2	<0.001
Seurat_3	<0.001	<0.001
Harmony	<0.001	<0.001	<0.001
fastMNN	<0.001	<0.001	<0.001	<0.001
MNN_Correct	<0.001	<0.001	<0.001	<0.001	<0.001
ComBat	<0.001	<0.001	<0.001	<0.001	<0.001	<0.001
limma	<0.001	<0.001	<0.001	<0.001	<0.001	<0.001	<0.001
scGen	<0.001	<0.001	<0.001	<0.001	<0.001	<0.001	<0.001	<0.001
Scanorama	<0.001	<0.001	<0.001	<0.001	<0.001	<0.001	<0.001	<0.001	<0.001
MMD-ResNet	<0.001	<0.001	<0.001	<0.001	<0.001	<0.001	<0.001	<0.001	<0.001	<0.001
ZINB-WaVE	<0.001	<0.001	<0.001	<0.001	<0.001	0.002	<0.001	<0.001	<0.001	<0.001	<0.001
scMerge	<0.001	<0.001	<0.001	<0.001	<0.001	<0.001	<0.001	<0.001	<0.001	<0.001	<0.001	<0.001
LIGER	<0.001	<0.001	<0.001	<0.001	<0.001	<0.001	<0.001	<0.001	<0.001	<0.001	<0.001	<0.001	<0.001
cLISI dataset 5
	Raw	Seurat_2	Seurat_3	Harmony	fastMNN	MNN_Correct	ComBat	limma	scGen	Scanorama	MMD-ResNet	ZINB-WaVE	scMerge
Seurat_2	<0.001
Seurat_3	<0.001	<0.001
Harmony	<0.001	<0.001	<0.001
fastMNN	<0.001	<0.001	<0.001	<0.001
MNN_Correct	<0.001	<0.001	<0.001	<0.001	<0.001
ComBat	<0.001	<0.001	<0.001	<0.001	<0.001	<0.001
limma	<0.001	<0.001	<0.001	<0.001	<0.001	<0.001	<0.001
scGen	<0.001	<0.001	<0.001	<0.001	<0.001	<0.001	<0.001	<0.001
Scanorama	<0.001	<0.001	<0.001	<0.001	<0.001	<0.001	<0.001	<0.001	<0.001
MMD-ResNet	<0.001	<0.001	<0.001	<0.001	<0.001	<0.001	<0.001	<0.001	<0.001	<0.001
ZINB-WaVE	<0.001	<0.001	<0.001	<0.001	<0.001	<0.001	<0.001	<0.001	<0.001	<0.001	<0.001
scMerge	<0.001	<0.001	<0.001	<0.001	<0.001	<0.001	<0.001	<0.001	<0.001	<0.001	<0.001	<0.001
LIGER	<0.001	<0.001	<0.001	<0.001	<0.001	<0.001	<0.001	0.387	<0.001	<0.001	<0.001	<0.001	<0.001
kBET dataset 5
	Raw	Seurat_2	Seurat_3	Harmony	fastMNN	MNN_Correct	ComBat	limma	scGen	Scanorama	MMD-ResNet	ZINB-WaVE	scMerge
Seurat_2	<0.001
Seurat_3	<0.001	<0.001
Harmony	<0.001	<0.001	<0.001
fastMNN	<0.001	<0.001	<0.001	<0.001
MNN_Correct	<0.001	<0.001	<0.001	<0.001	<0.001
ComBat	<0.001	<0.001	<0.001	<0.001	<0.001	0.069
limma	<0.001	<0.001	<0.001	<0.001	<0.001	<0.001	<0.001
scGen	<0.001	<0.001	<0.001	<0.001	0.002	<0.001	<0.001	<0.001
Scanorama	<0.001	<0.001	<0.001	<0.001	<0.001	<0.001	<0.001	<0.001	<0.001
MMD-ResNet	<0.001	<0.001	<0.001	<0.001	<0.001	<0.001	<0.001	<0.001	<0.001	<0.001
ZINB-WaVE	<0.001	<0.001	<0.001	<0.001	<0.001	<0.001	0.026	<0.001	<0.001	<0.001	<0.001
scMerge	<0.001	<0.001	<0.001	<0.001	<0.001	<0.001	<0.001	<0.001	<0.001	<0.001	<0.001	<0.001
LIGER	<0.001	<0.001	<0.001	<0.001	<0.001	<0.001	<0.001	<0.001	<0.001	<0.001	<0.001	<0.001	<0.001
ARI batch dataset 6
	Raw	Seurat_2	Seurat_3	Harmony	fastMNN	MNN_Correct	ComBat	limma	scGen	Scanorama	MMD-ResNet	ZINB-WaVE	scMerge
Seurat_2	0.005
Seurat_3	<0.001	<0.001
Harmony	0.004	<0.001	<0.001
fastMNN	<0.001	<0.001	<0.001	<0.001
MNN_Correct	<0.001	<0.001	<0.001	<0.001	0.141
ComBat	<0.001	<0.001	<0.001	<0.001	<0.001	<0.001
limma	<0.001	<0.001	<0.001	<0.001	<0.001	<0.001	<0.001
scGen	0.989	<0.001	<0.001	<0.001	<0.001	<0.001	<0.001	<0.001
Scanorama	<0.001	0.026	<0.001	<0.001	<0.001	<0.001	<0.001	<0.001	<0.001
MMD-ResNet	<0.001	<0.001	<0.001	0.006	<0.001	<0.001	<0.001	<0.001	<0.001	<0.001
ZINB-WaVE	<0.001	<0.001	<0.001	<0.001	<0.001	<0.001	<0.001	<0.001	<0.001	<0.001	0.377
scMerge	<0.001	<0.001	<0.001	<0.001	<0.001	<0.001	<0.001	<0.001	<0.001	<0.001	0.957	0.039
LIGER	<0.001	<0.001	<0.001	<0.001	<0.001	<0.001	0.002	<0.001	<0.001	<0.001	<0.001	<0.001	<0.001
ARI cell type dataset 6
	Raw	Seurat_2	Seurat_3	Harmony	fastMNN	MNN_Correct	ComBat	limma	scGen	Scanorama	MMD-ResNet	ZINB-WaVE	scMerge
Seurat_2	<0.001
Seurat_3	<0.001	<0.001
Harmony	<0.001	<0.001	<0.001
fastMNN	0.02	0.005	<0.001	<0.001
MNN_Correct	0.008	0.005	<0.001	<0.001	0.411
ComBat	<0.001	0.829	<0.001	<0.001	<0.001	<0.001
limma	0.154	0.002	<0.001	<0.001	0.139	0.063	<0.001
scGen	<0.001	<0.001	<0.001	0.903	<0.001	<0.001	<0.001	<0.001
Scanorama	<0.001	<0.001	<0.001	0.041	<0.001	<0.001	<0.001	<0.001	0.013
MMD-ResNet	<0.001	<0.001	<0.001	<0.001	<0.001	<0.001	<0.001	<0.001	<0.001	<0.001
ZINB-WaVE	<0.001	<0.001	<0.001	<0.001	<0.001	<0.001	<0.001	<0.001	<0.001	<0.001	<0.001
scMerge	<0.001	<0.001	<0.001	<0.001	<0.001	<0.001	<0.001	<0.001	<0.001	<0.001	<0.001	<0.001
LIGER	<0.001	0.027	<0.001	<0.001	<0.001	<0.001	<0.001	<0.001	<0.001	<0.001	<0.001	<0.001	<0.001
ASW batch dataset 6
	Raw	Seurat_2	Seurat_3	Harmony	fastMNN	MNN_Correct	ComBat	limma	scGen	Scanorama	MMD-ResNet	ZINB-WaVE	scMerge
Seurat_2	<0.001
Seurat_3	1	<0.001
Harmony	<0.001	<0.001	<0.001
fastMNN	1	1	1	1
MNN_Correct	<0.001	<0.001	<0.001	<0.001	<0.001
ComBat	<0.001	<0.001	1	<0.001	1	1
limma	<0.001	<0.001	1	<0.001	1	1	<0.001
scGen	<0.001	<0.001	<0.001	<0.001	1	<0.001	<0.001	<0.001
Scanorama	<0.001	1	<0.001	0.873	1	<0.001	<0.001	<0.001	1
MMD-ResNet	0.019	<0.001	1	<0.001	1	<0.001	<0.001	<0.001	<0.001	1
ZINB-WaVE	<0.001	0.009	<0.001	<0.001	1	<0.001	<0.001	<0.001	1	1	<0.001
scMerge	<0.001	<0.001	<0.001	0.688	1	<0.001	<0.001	<0.001	<0.001	<0.001	<0.001	<0.001
LIGER	1	1	<0.001	1	1	<0.001	<0.001	<0.001	1	1	1	1	1
ASW cell type dataset 6
	Raw	Seurat_2	Seurat_3	Harmony	fastMNN	MNN_Correct	ComBat	limma	scGen	Scanorama	MMD-ResNet	ZINB-WaVE	scMerge
Seurat_2	<0.001
Seurat_3	<0.001	<0.001
Harmony	<0.001	<0.001	<0.001
fastMNN	<0.001	<0.001	<0.001	<0.001
MNN_Correct	<0.001	<0.001	<0.001	<0.001	0.002
ComBat	<0.001	<0.001	<0.001	<0.001	<0.001	<0.001
limma	<0.001	<0.001	<0.001	<0.001	<0.001	<0.001	<0.001
scGen	<0.001	<0.001	<0.001	<0.001	<0.001	<0.001	<0.001	<0.001
Scanorama	<0.001	<0.001	<0.001	<0.001	<0.001	<0.001	<0.001	<0.001	<0.001
MMD-ResNet	<0.001	<0.001	<0.001	<0.001	<0.001	<0.001	<0.001	<0.001	<0.001	<0.001
ZINB-WaVE	<0.001	<0.001	<0.001	<0.001	<0.001	<0.001	<0.001	<0.001	<0.001	<0.001	<0.001
scMerge	<0.001	<0.001	<0.001	<0.001	<0.001	<0.001	<0.001	<0.001	<0.001	<0.001	<0.001	<0.001
LIGER	<0.001	<0.001	<0.001	<0.001	<0.001	<0.001	<0.001	<0.001	<0.001	<0.001	<0.001	<0.001	<0.001
iLISI dataset 6
	Raw	Seurat_2	Seurat_3	Harmony	fastMNN	MNN_Correct	ComBat	limma	scGen	Scanorama	MMD-ResNet	ZINB-WaVE	scMerge
Raw
Seurat_2	<0.001
Seurat_3	<0.001	<0.001
Harmony	<0.001	<0.001	<0.001
fastMNN	<0.001	<0.001	0.531	<0.001
MNN_Correct	<0.001	<0.001	<0.001	<0.001	<0.001
ComBat	<0.001	<0.001	<0.001	<0.001	<0.001	<0.001
limma	<0.001	<0.001	<0.001	<0.001	<0.001	<0.001	<0.001
scGen	<0.001	<0.001	<0.001	0.002	<0.001	<0.001	<0.001	<0.001
Scanorama	<0.001	<0.001	<0.001	<0.001	<0.001	<0.001	<0.001	<0.001	<0.001
MMD-ResNet	<0.001	<0.001	<0.001	<0.001	0.212	<0.001	<0.001	<0.001	<0.001	<0.001
ZINB-WaVE	<0.001	<0.001	<0.001	<0.001	<0.001	<0.001	<0.001	<0.001	<0.001	<0.001	<0.001
scMerge	<0.001	<0.001	<0.001	<0.001	<0.001	<0.001	<0.001	<0.001	<0.001	<0.001	<0.001	<0.001
LIGER	<0.001	0.494	<0.001	<0.001	<0.001	<0.001	<0.001	<0.001	<0.001	<0.001	<0.001	<0.001	<0.001
cLISI dataset 6
	Raw	Seurat_2	Seurat_3	Harmony	fastMNN	MNN_Correct	ComBat	limma	scGen	Scanorama	MMD-ResNet	ZINB-WaVE	scMerge
Seurat_2	<0.001
Seurat_3	<0.001	<0.001
Harmony	<0.001	<0.001	<0.001
fastMNN	<0.001	<0.001	<0.001	<0.001
MNN_Correct	<0.001	<0.001	<0.001	<0.001	<0.001
ComBat	<0.001	<0.001	<0.001	<0.001	<0.001	<0.001
limma	<0.001	<0.001	<0.001	<0.001	<0.001	<0.001	<0.001
scGen	<0.001	<0.001	<0.001	0.932	<0.001	<0.001	<0.001	<0.001
Scanorama	0.006	<0.001	<0.001	0.51	<0.001	<0.001	<0.001	<0.001	0.562
MMD-ResNet	<0.001	<0.001	<0.001	<0.001	<0.001	<0.001	<0.001	<0.001	<0.001	<0.001
ZINB-WaVE	<0.001	<0.001	<0.001	<0.001	<0.001	<0.001	<0.001	<0.001	<0.001	<0.001	<0.001
scMerge	0.188	<0.001	<0.001	<0.001	<0.001	<0.001	<0.001	<0.001	<0.001	<0.001	<0.001	<0.001
LIGER	<0.001	<0.001	<0.001	<0.001	<0.001	<0.001	<0.001	<0.001	<0.001	<0.001	<0.001	<0.001	<0.001
kBET dataset 6
	Raw	Seurat_2	Seurat_3	Harmony	fastMNN	MNN_Correct	ComBat	limma	scGen	Scanorama	MMD-ResNet	ZINB-WaVE	scMerge
Seurat_2	<0.001
Seurat_3	<0.001	<0.001
Harmony	<0.001	<0.001	<0.001
fastMNN	<0.001	0.001	<0.001	<0.001
MNN_Correct	<0.001	<0.001	<0.001	<0.001	<0.001
ComBat	<0.001	<0.001	<0.001	<0.001	<0.001	<0.001
limma	<0.001	<0.001	<0.001	<0.001	<0.001	<0.001	<0.001
scGen	<0.001	<0.001	<0.001	<0.001	<0.001	<0.001	<0.001	<0.001
Scanorama	<0.001	<0.001	<0.001	<0.001	<0.001	<0.001	<0.001	<0.001	<0.001
MMD-ResNet	<0.001	0.473	<0.001	<0.001	0.006	<0.001	<0.001	<0.001	<0.001	<0.001
ZINB-WaVE	<0.001	<0.001	<0.001	<0.001	<0.001	<0.001	<0.001	<0.001	<0.001	<0.001	<0.001
scMerge	<0.001	<0.001	<0.001	<0.001	<0.001	<0.001	<0.001	<0.001	<0.001	<0.001	<0.001	<0.001
LIGER	<0.001	<0.001	<0.001	<0.001	<0.001	<0.001	<0.001	<0.001	<0.001	<0.001	<0.001	<0.001	<0.001
ARI batch dataset 7
	Raw	Seurat_2	Seurat_3	Harmony	fastMNN	MNN_Correct	ComBat	limma	scGen	Scanorama	MMD-ResNet	ZINB-WaVE	scMerge
Seurat_2	<0.001
Seurat_3	0.063	<0.001
Harmony	<0.001	0.056	0.01
fastMNN	<0.001	<0.001	0.023	0.243
MNN_Correct	<0.001	0.459	<0.001	0.006	<0.001
ComBat	0.143	<0.001	0.437	<0.001	<0.001	<0.001
limma	<0.001	<0.001	0.349	0.026	0.022	<0.001	0.005
scGen	<0.001	0.026	<0.001	<0.001	<0.001	0.706	<0.001	<0.001
Scanorama	<0.001	0.001	<0.001	<0.001	<0.001	0.235	<0.001	<0.001	0.263
MMD-ResNet	<0.001	<0.001	<0.001	<0.001	<0.001	<0.001	<0.001	<0.001	<0.001	<0.001
ZINB-WaVE	<0.001	0.03	<0.001	<0.001	<0.001	0.448	<0.001	<0.001	0.584	0.517	<0.001
scMerge	<0.001	0.003	<0.001	<0.001	<0.001	0.349	<0.001	<0.001	0.517	0.674	<0.001	0.738
LIGER	<0.001	<0.001	<0.001	<0.001	<0.001	<0.001	<0.001	<0.001	<0.001	0.003	<0.001	<0.001	<0.001
ARI cell type dataset 7
	Raw	Seurat_2	Seurat_3	Harmony	fastMNN	MNN_Correct	ComBat	limma	scGen	Scanorama	MMD-ResNet	ZINB-WaVE	scMerge
Seurat_2	<0.001
Seurat_3	0.293	<0.001
Harmony	0.274	<0.001	0.038
fastMNN	0.092	<0.001	0.004	0.338
MNN_Correct	<0.001	<0.001	<0.001	<0.001	<0.001
ComBat	0.005	<0.001	<0.001	0.023	0.113	0.016
limma	<0.001	0.517	<0.001	<0.001	<0.001	<0.001	<0.001
scGen	<0.001	0.001	<0.001	<0.001	<0.001	0.033	<0.001	<0.001
Scanorama	<0.001	0.883	<0.001	<0.001	<0.001	<0.001	<0.001	0.423	<0.001
MMD-ResNet	<0.001	<0.001	<0.001	<0.001	<0.001	<0.001	<0.001	<0.001	<0.001	<0.001
ZINB-WaVE	<0.001	0.274	<0.001	<0.001	<0.001	<0.001	<0.001	0.019	0.008	0.097	<0.001
scMerge	<0.001	0.002	<0.001	<0.001	<0.001	<0.001	<0.001	<0.001	<0.001	<0.001	<0.001	<0.001
LIGER	<0.001	0.284	<0.001	<0.001	<0.001	<0.001	<0.001	0.302	<0.001	0.073	<0.001	0.002	0.003
ASW batch dataset 7
	Raw	Seurat_2	Seurat_3	Harmony	fastMNN	MNN_Correct	ComBat	limma	scGen	Scanorama	MMD-ResNet	ZINB-WaVE	scMerge
Seurat_2	<0.001
Seurat_3	<0.001	<0.001
Harmony	<0.001	<0.001	<0.001
fastMNN	<0.001	<0.001	<0.001	<0.001
MNN_Correct	<0.001	<0.001	<0.001	<0.001	<0.001
ComBat	<0.001	<0.001	<0.001	<0.001	<0.001	<0.001
limma	<0.001	<0.001	<0.001	<0.001	<0.001	<0.001	<0.001
scGen	<0.001	<0.001	<0.001	<0.001	<0.001	<0.001	<0.001	<0.001
Scanorama	<0.001	<0.001	<0.001	<0.001	<0.001	<0.001	<0.001	<0.001	<0.001
MMD-ResNet	<0.001	<0.001	<0.001	<0.001	<0.001	<0.001	<0.001	<0.001	<0.001	<0.001
ZINB-WaVE	<0.001	<0.001	<0.001	<0.001	<0.001	<0.001	<0.001	<0.001	<0.001	<0.001	<0.001
scMerge	<0.001	<0.001	<0.001	<0.001	<0.001	<0.001	<0.001	<0.001	<0.001	<0.001	<0.001	<0.001
LIGER	<0.001	<0.001	<0.001	<0.001	<0.001	<0.001	<0.001	<0.001	<0.001	<0.001	<0.001	<0.001	<0.001
ASW cell type dataset 7
	Raw	Seurat_2	Seurat_3	Harmony	fastMNN	MNN_Correct	ComBat	limma	scGen	Scanorama	MMD-ResNet	ZINB-WaVE	scMerge
Seurat_2	<0.001
Seurat_3	<0.001	<0.001
Harmony	<0.001	<0.001	<0.001
fastMNN	<0.001	<0.001	<0.001	0.192
MNN_Correct	<0.001	<0.001	<0.001	<0.001	<0.001
ComBat	0.001	<0.001	<0.001	<0.001	<0.001	<0.001
limma	<0.001	<0.001	<0.001	<0.001	<0.001	<0.001	<0.001
scGen	<0.001	<0.001	<0.001	<0.001	<0.001	<0.001	<0.001	<0.001
Scanorama	<0.001	<0.001	<0.001	<0.001	<0.001	<0.001	<0.001	<0.001	<0.001
MMD-ResNet	<0.001	<0.001	<0.001	<0.001	<0.001	<0.001	<0.001	<0.001	<0.001	<0.001
ZINB-WaVE	<0.001	<0.001	<0.001	<0.001	<0.001	<0.001	<0.001	<0.001	<0.001	<0.001	<0.001
scMerge	<0.001	<0.001	<0.001	<0.001	<0.001	<0.001	<0.001	<0.001	<0.001	<0.001	<0.001	<0.001
LIGER	<0.001	<0.001	<0.001	<0.001	<0.001	<0.001	<0.001	<0.001	<0.001	<0.001	<0.001	<0.001	<0.001
iLISI dataset 7
	Raw	Seurat_2	Seurat_3	Harmony	fastMNN	MNN_Correct	ComBat	limma	scGen	Scanorama	MMD-ResNet	ZINB-WaVE	scMerge
Seurat_2	0.118
Seurat_3	<0.001	<0.001
Harmony	<0.001	<0.001	<0.001
fastMNN	<0.001	<0.001	<0.001	<0.001
MNN_Correct	<0.001	<0.001	<0.001	<0.001	<0.001
ComBat	<0.001	<0.001	<0.001	<0.001	<0.001	<0.001
limma	<0.001	<0.001	<0.001	<0.001	<0.001	<0.001	<0.001
scGen	<0.001	<0.001	<0.001	<0.001	<0.001	<0.001	<0.001	<0.001
Scanorama	<0.001	<0.001	<0.001	<0.001	<0.001	<0.001	<0.001	<0.001	<0.001
MMD-ResNet	<0.001	<0.001	<0.001	<0.001	<0.001	0.002	<0.001	<0.001	<0.001	<0.001
ZINB-WaVE	<0.001	<0.001	<0.001	<0.001	<0.001	0.147	<0.001	<0.001	<0.001	<0.001	<0.001
scMerge	<0.001	<0.001	<0.001	<0.001	<0.001	0.219	<0.001	<0.001	<0.001	<0.001	<0.001	0.62
LIGER	<0.001	<0.001	<0.001	<0.001	<0.001	<0.001	<0.001	<0.001	<0.001	<0.001	<0.001	<0.001	<0.001
cLISI dataset 7
	Raw	Seurat_2	Seurat_3	Harmony	fastMNN	MNN_Correct	ComBat	limma	scGen	Scanorama	MMD-ResNet	ZINB-WaVE	scMerge
Seurat_2	<0.001
Seurat_3	<0.001	<0.001
Harmony	<0.001	<0.001	<0.001
fastMNN	<0.001	<0.001	<0.001	<0.001
MNN_Correct	<0.001	<0.001	<0.001	<0.001	<0.001
ComBat	<0.001	<0.001	<0.001	<0.001	<0.001	<0.001
limma	<0.001	<0.001	<0.001	<0.001	<0.001	<0.001	<0.001
scGen	<0.001	<0.001	<0.001	0.813	<0.001	<0.001	<0.001	<0.001
Scanorama	<0.001	<0.001	<0.001	<0.001	<0.001	<0.001	<0.001	<0.001	<0.001
MMD-ResNet	<0.001	<0.001	<0.001	<0.001	<0.001	<0.001	<0.001	<0.001	<0.001	<0.001
ZINB-WaVE	<0.001	<0.001	<0.001	<0.001	<0.001	<0.001	<0.001	<0.001	<0.001	<0.001	<0.001
scMerge	<0.001	<0.001	<0.001	<0.001	<0.001	<0.001	<0.001	<0.001	<0.001	<0.001	<0.001	<0.001
LIGER	<0.001	<0.001	<0.001	<0.001	<0.001	0.807	<0.001	<0.001	<0.001	<0.001	<0.001	<0.001	<0.001
kBET dataset 7
	Raw	Seurat_2	Seurat_3	Harmony	fastMNN	MNN_Correct	ComBat	limma	scGen	Scanorama	MMD-ResNet	ZINB-WaVE	scMerge
Seurat_2	<0.001
Seurat_3	<0.001	<0.001
Harmony	<0.001	<0.001	<0.001
fastMNN	<0.001	<0.001	<0.001	<0.001
MNN_Correct	<0.001	<0.001	<0.001	<0.001	0.004
ComBat	<0.001	<0.001	<0.001	<0.001	<0.001	<0.001
limma	<0.001	<0.001	<0.001	<0.001	<0.001	<0.001	<0.001
scGen	<0.001	<0.001	<0.001	<0.001	<0.001	<0.001	<0.001	<0.001
Scanorama	<0.001	<0.001	<0.001	<0.001	0.208	<0.001	<0.001	<0.001	<0.001
MMD-ResNet	<0.001	<0.001	<0.001	0.119	<0.001	<0.001	<0.001	<0.001	<0.001	<0.001
ZINB-WaVE	0.885	<0.001	<0.001	<0.001	<0.001	<0.001	<0.001	<0.001	<0.001	<0.001	<0.001
scMerge	<0.001	<0.001	<0.001	<0.001	<0.001	<0.001	<0.001	<0.001	<0.001	<0.001	<0.001	<0.001
LIGER	<0.001	<0.001	<0.001	<0.001	<0.001	0.176	<0.001	<0.001	0.035	<0.001	<0.001	<0.001	<0.001
ARI batch dataset 8
	Raw	Seurat_2	Seurat_3	Harmony	fastMNN	MNN_Correct	ComBat	limma	scGen	Scanorama	MMD-ResNet	ZINB-WaVE	scMerge
Seurat_2	0.957
Seurat_3	0.878	0.968
Harmony	0.968	<0.001	<0.001
fastMNN	0.276	<0.001	<0.001	<0.001
MNN_Correct	0.117	<0.001	<0.001	<0.001	<0.001
ComBat	0.353	0.221	0.176	0.014	0.01	<0.001
limma	<0.001	<0.001	<0.001	<0.001	<0.001	<0.001	<0.001
scGen	<0.001	<0.001	<0.001	<0.001	<0.001	<0.001	<0.001	<0.001
Scanorama	1	<0.001	<0.001	<0.001	<0.001	<0.001	<0.001	<0.001	<0.001
MMD-ResNet	0.176	<0.001	<0.001	<0.001	0.003	<0.001	<0.001	<0.001	<0.001	<0.001
ZINB-WaVE	0.968	<0.001	<0.001	0.363	<0.001	<0.001	0.002	<0.001	<0.001	<0.001	<0.001
scMerge	0.183	<0.001	<0.001	<0.001	0.004	0.012	<0.001	<0.001	<0.001	<0.001	0.524	<0.001
LIGER	1	0.114	0.117	0.001	<0.001	<0.001	0.554	<0.001	<0.001	<0.001	<0.001	0.001	<0.001
ARI cell type dataset 8
	Raw	Seurat_2	Seurat_3	Harmony	fastMNN	MNN_Correct	ComBat	limma	scGen	Scanorama	MMD-ResNet	ZINB-WaVE	scMerge
Seurat_2	<0.001
Seurat_3	<0.001	<0.001
Harmony	<0.001	<0.001	0.198
fastMNN	0.417	<0.001	<0.001	<0.001
MNN_Correct	0.925	<0.001	<0.001	<0.001	0.003
ComBat	<0.001	<0.001	0.248	0.016	<0.001	<0.001
limma	<0.001	0.061	<0.001	<0.001	<0.001	<0.001	<0.001
scGen	<0.001	<0.001	0.028	0.008	<0.001	<0.001	<0.001	<0.001
Scanorama	<0.001	0.307	<0.001	<0.001	<0.001	<0.001	<0.001	0.007	<0.001
MMD-ResNet	<0.001	0.059	<0.001	<0.001	<0.001	<0.001	<0.001	0.002	<0.001	0.34
ZINB-WaVE	<0.001	0.061	<0.001	<0.001	<0.001	<0.001	<0.001	0.001	<0.001	0.571	0.506
scMerge	0.38	<0.001	<0.001	<0.001	0.105	<0.001	<0.001	<0.001	<0.001	<0.001	<0.001	<0.001
LIGER	<0.001	<0.001	0.417	0.506	<0.001	<0.001	0.007	<0.001	0.34	<0.001	<0.001	<0.001	<0.001
ASW batch dataset 8
	Raw	Seurat_2	Seurat_3	Harmony	fastMNN	MNN_Correct	ComBat	limma	scGen	Scanorama	MMD-ResNet	ZINB-WaVE	scMerge
Seurat_2	<0.001
Seurat_3	<0.001	<0.001
Harmony	<0.001	<0.001	<0.001
fastMNN	<0.001	<0.001	<0.001	<0.001
MNN_Correct	<0.001	<0.001	<0.001	<0.001	<0.001
ComBat	<0.001	<0.001	<0.001	<0.001	<0.001	<0.001
limma	<0.001	<0.001	<0.001	<0.001	<0.001	<0.001	<0.001
scGen	<0.001	<0.001	<0.001	<0.001	<0.001	<0.001	<0.001	<0.001
Scanorama	<0.001	<0.001	<0.001	<0.001	<0.001	<0.001	<0.001	<0.001	<0.001
MMD-ResNet	<0.001	<0.001	<0.001	<0.001	<0.001	<0.001	<0.001	<0.001	<0.001	<0.001
ZINB-WaVE	<0.001	<0.001	<0.001	<0.001	<0.001	<0.001	<0.001	<0.001	<0.001	<0.001	<0.001
scMerge	<0.001	<0.001	<0.001	<0.001	<0.001	<0.001	<0.001	<0.001	<0.001	<0.001	<0.001	<0.001
LIGER	<0.001	<0.001	<0.001	<0.001	<0.001	<0.001	<0.001	<0.001	<0.001	<0.001	<0.001	<0.001	<0.001
ASW cell type dataset 8
	Raw	Seurat_2	Seurat_3	Harmony	fastMNN	MNN_Correct	ComBat	limma	scGen	Scanorama	MMD-ResNet	ZINB-WaVE	scMerge
Seurat_2	<0.001
Seurat_3	<0.001	<0.001
Harmony	<0.001	<0.001	<0.001
fastMNN	<0.001	<0.001	<0.001	<0.001
MNN_Correct	<0.001	<0.001	<0.001	<0.001	<0.001
ComBat	<0.001	0.029	<0.001	<0.001	<0.001	<0.001
limma	<0.001	<0.001	<0.001	<0.001	<0.001	<0.001	<0.001
scGen	<0.001	<0.001	<0.001	<0.001	<0.001	<0.001	<0.001	<0.001
Scanorama	<0.001	<0.001	<0.001	<0.001	<0.001	<0.001	<0.001	<0.001	<0.001
MMD-ResNet	<0.001	<0.001	<0.001	<0.001	<0.001	<0.001	<0.001	<0.001	<0.001	<0.001
ZINB-WaVE	<0.001	0.027	<0.001	<0.001	<0.001	<0.001	0.02	<0.001	<0.001	<0.001	<0.001
scMerge	<0.001	<0.001	<0.001	<0.001	<0.001	<0.001	0.003	<0.001	<0.001	<0.001	<0.001	0.231
LIGER	<0.001	<0.001	<0.001	<0.001	<0.001	<0.001	<0.001	<0.001	<0.001	<0.001	<0.001	<0.001	<0.001
iLISI dataset 8
	Raw	Seurat_2	Seurat_3	Harmony	fastMNN	MNN_Correct	ComBat	limma	scGen	Scanorama	MMD-ResNet	ZINB-WaVE	scMerge
Seurat_2	<0.001
Seurat_3	<0.001	<0.001
Harmony	<0.001	<0.001	<0.001
fastMNN	<0.001	<0.001	<0.001	<0.001
MNN_Correct	<0.001	<0.001	<0.001	<0.001	<0.001
ComBat	<0.001	<0.001	<0.001	<0.001	<0.001	<0.001
limma	<0.001	<0.001	<0.001	<0.001	<0.001	<0.001	<0.001
scGen	<0.001	<0.001	<0.001	<0.001	<0.001	<0.001	<0.001	<0.001
Scanorama	<0.001	<0.001	<0.001	<0.001	<0.001	<0.001	<0.001	<0.001	<0.001
MMD-ResNet	0.536	<0.001	<0.001	<0.001	<0.001	<0.001	<0.001	<0.001	<0.001	<0.001
ZINB-WaVE	<0.001	<0.001	<0.001	<0.001	<0.001	0.064	<0.001	<0.001	<0.001	<0.001	<0.001
scMerge	<0.001	<0.001	<0.001	<0.001	<0.001	<0.001	<0.001	<0.001	<0.001	<0.001	<0.001	<0.001
LIGER	<0.001	0.057	<0.001	<0.001	<0.001	<0.001	<0.001	<0.001	<0.001	<0.001	<0.001	<0.001	<0.001
cLISI dataset 8
	Raw	Seurat_2	Seurat_3	Harmony	fastMNN	MNN_Correct	ComBat	limma	scGen	Scanorama	MMD-ResNet	ZINB-WaVE	scMerge
Seurat_2	<0.001
Seurat_3	<0.001	<0.001
Harmony	<0.001	<0.001	0.1
fastMNN	<0.001	<0.001	<0.001	<0.001
MNN_Correct	<0.001	<0.001	<0.001	0.276	<0.001
ComBat	0.017	<0.001	<0.001	<0.001	<0.001	<0.001
limma	<0.001	<0.001	<0.001	<0.001	<0.001	<0.001	0.021
scGen	<0.001	<0.001	<0.001	<0.001	<0.001	<0.001	0.002	0.701
Scanorama	<0.001	<0.001	0.009	<0.001	<0.001	<0.001	<0.001	<0.001	<0.001
MMD-ResNet	0.953	<0.001	<0.001	<0.001	<0.001	<0.001	0.019	<0.001	<0.001	<0.001
ZINB-WaVE	<0.001	0.009	<0.001	<0.001	<0.001	<0.001	<0.001	<0.001	<0.001	<0.001	<0.001
scMerge	<0.001	<0.001	<0.001	<0.001	<0.001	<0.001	<0.001	<0.001	<0.001	<0.001	<0.001	<0.001
LIGER	<0.001	<0.001	<0.001	<0.001	<0.001	<0.001	<0.001	<0.001	<0.001	<0.001	<0.001	<0.001	<0.001
kBET dataset 8
	Raw	Seurat_2	Seurat_3	Harmony	fastMNN	MNN_Correct	ComBat	limma	scGen	Scanorama	MMD-ResNet	ZINB-WaVE	scMerge
Seurat_2	<0.001
Seurat_3	<0.001	<0.001
Harmony	<0.001	<0.001	<0.001
fastMNN	<0.001	<0.001	<0.001	<0.001
MNN_Correct	<0.001	<0.001	<0.001	<0.001	<0.001
ComBat	<0.001	<0.001	<0.001	<0.001	<0.001	<0.001
limma	<0.001	<0.001	<0.001	<0.001	<0.001	<0.001	<0.001
scGen	<0.001	0.091	<0.001	<0.001	<0.001	<0.001	<0.001	<0.001
Scanorama	<0.001	<0.001	<0.001	<0.001	<0.001	<0.001	<0.001	<0.001	<0.001
MMD-ResNet	<0.001	0.125	<0.001	<0.001	<0.001	<0.001	<0.001	<0.001	0.438	<0.001
ZINB-WaVE	<0.001	<0.001	<0.001	<0.001	<0.001	<0.001	<0.001	<0.001	<0.001	<0.001	<0.001
scMerge	<0.001	<0.001	<0.001	<0.001	<0.001	<0.001	<0.001	<0.001	<0.001	<0.001	<0.001	<0.001
LIGER	<0.001	<0.001	<0.001	<0.001	<0.001	<0.001	<0.001	<0.001	<0.001	<0.001	<0.001	<0.001	<0.001
ARI batch dataset 9
	Raw	Seurat_2	Seurat_3	Harmony	fastMNN	MNN_Correct	ComBat	limma	scGen	Scanorama	MMD-ResNet	ZINB-WaVE	scMerge
Seurat_2	<0.001
Seurat_3	<0.001	0.173
Harmony	<0.001	0.002	0.099
fastMNN	<0.001	1	<0.001	<0.001
MNN_Correct	<0.001	<0.001	0.074	0.477	<0.001
ComBat	<0.001	0.013	0.114	<0.001	<0.001	<0.001
limma	<0.001	<0.001	<0.001	<0.001	<0.001	<0.001	<0.001
scGen	<0.001	1	<0.001	<0.001	<0.001	<0.001	<0.001	<0.001
Scanorama	<0.001	0.002	<0.001	<0.001	<0.001	<0.001	<0.001	<0.001	<0.001
MMD-ResNet	<0.001	0.054	0.114	<0.001	<0.001	<0.001	<0.001	<0.001	<0.001	<0.001
ZINB-WaVE	<0.001	0.654	<0.001	<0.001	0.034	<0.001	<0.001	<0.001	0.034	0.006	<0.001
scMerge	<0.001	<0.001	<0.001	<0.001	<0.001	<0.001	<0.001	<0.001	<0.001	<0.001	<0.001	<0.001
LIGER	0.003	<0.001	<0.001	<0.001	<0.001	<0.001	<0.001	0.007	<0.001	<0.001	<0.001	<0.001	<0.001
ASW batch dataset 9
	Raw	Seurat_2	Seurat_3	Harmony	fastMNN	MNN_Correct	ComBat	limma	scGen	Scanorama	MMD-ResNet	ZINB-WaVE	scMerge
Seurat_2	<0.001
Seurat_3	<0.001	<0.001
Harmony	<0.001	<0.001	<0.001
fastMNN	<0.001	<0.001	<0.001	<0.001
MNN_Correct	<0.001	<0.001	<0.001	<0.001	<0.001
ComBat	<0.001	<0.001	<0.001	<0.001	<0.001	<0.001
limma	<0.001	<0.001	<0.001	<0.001	<0.001	<0.001	<0.001
scGen	<0.001	<0.001	<0.001	<0.001	<0.001	<0.001	<0.001	<0.001
Scanorama	<0.001	<0.001	<0.001	<0.001	<0.001	<0.001	<0.001	<0.001	<0.001
MMD-ResNet	<0.001	<0.001	<0.001	<0.001	<0.001	<0.001	<0.001	<0.001	<0.001	<0.001
ZINB-WaVE	<0.001	<0.001	<0.001	<0.001	<0.001	<0.001	<0.001	<0.001	<0.001	<0.001	<0.001
scMerge	<0.001	<0.001	<0.001	<0.001	<0.001	<0.001	<0.001	<0.001	<0.001	<0.001	<0.001	<0.001
LIGER	<0.001	<0.001	<0.001	<0.001	<0.001	<0.001	<0.001	<0.001	<0.001	<0.001	<0.001	<0.001	<0.001
iLISI dataset 9
	Raw	Seurat_2	Seurat_3	Harmony	fastMNN	MNN_Correct	ComBat	limma	scGen	Scanorama	MMD-ResNet	ZINB-WaVE	scMerge
Seurat_2	<0.001
Seurat_3	<0.001	<0.001
Harmony	<0.001	<0.001	<0.001
fastMNN	<0.001	<0.001	<0.001	<0.001
MNN_Correct	<0.001	<0.001	<0.001	<0.001	<0.001
ComBat	<0.001	<0.001	<0.001	<0.001	<0.001	0.538
limma	<0.001	<0.001	<0.001	<0.001	<0.001	<0.001	<0.001
scGen	<0.001	<0.001	<0.001	<0.001	<0.001	0.568	0.448	<0.001
Scanorama	<0.001	<0.001	<0.001	<0.001	<0.001	<0.001	<0.001	<0.001	<0.001
MMD-ResNet	<0.001	<0.001	0.037	<0.001	<0.001	<0.001	<0.001	<0.001	<0.001	<0.001
ZINB-WaVE	<0.001	<0.001	<0.001	<0.001	<0.001	<0.001	<0.001	<0.001	<0.001	<0.001	<0.001
scMerge	<0.001	<0.001	<0.001	<0.001	<0.001	<0.001	<0.001	<0.001	<0.001	<0.001	<0.001	<0.001
LIGER	<0.001	<0.001	<0.001	<0.001	<0.001	<0.001	<0.001	<0.001	<0.001	<0.001	<0.001	<0.001	<0.001
kBET dataset 9
	Raw	Seurat_2	Seurat_3	Harmony	fastMNN	MNN_Correct	ComBat	limma	scGen	Scanorama	MMD-ResNet	ZINB-WaVE	scMerge
Seurat_2	<0.001
Seurat_3	<0.001	<0.001
Harmony	<0.001	<0.001	<0.001
fastMNN	<0.001	<0.001	0.002	<0.001
MNN_Correct	<0.001	<0.001	<0.001	<0.001	<0.001
ComBat	<0.001	<0.001	<0.001	<0.001	<0.001	0.12
limma	<0.001	<0.001	<0.001	<0.001	<0.001	<0.001	<0.001
scGen	<0.001	<0.001	0.008	<0.001	<0.001	<0.001	<0.001	<0.001
Scanorama	<0.001	<0.001	<0.001	<0.001	<0.001	<0.001	<0.001	<0.001	<0.001
MMD-ResNet	<0.001	<0.001	<0.001	<0.001	<0.001	<0.001	<0.001	<0.001	<0.001	<0.001
ZINB-WaVE	<0.001	<0.001	<0.001	<0.001	<0.001	<0.001	<0.001	<0.001	<0.001	<0.001	<0.001
scMerge	<0.001	<0.001	<0.001	<0.001	<0.001	<0.001	<0.001	<0.001	<0.001	<0.001	<0.001	<0.001
LIGER	<0.001	<0.001	<0.001	<0.001	<0.001	<0.001	<0.001	<0.001	<0.001	<0.001	<0.001	0.049	<0.001
ARI batch dataset 10
	Raw	Seurat_2	Seurat_3	Harmony	fastMNN	MNN_Correct	ComBat	limma	scGen	Scanorama	MMD-ResNet	ZINB-WaVE	scMerge
Seurat_2	<0.001
Seurat_3	<0.001	<0.001
Harmony	<0.001	<0.001	0.001
fastMNN	<0.001	<0.001	<0.001	<0.001
MNN_Correct	<0.001	<0.001	<0.001	<0.001	0.196
ComBat	<0.001	<0.001	<0.001	0.015	0.256	0.128
limma	<0.001	<0.001	<0.001	0.011	0.188	0.104	0.578
scGen	<0.001	<0.001	<0.001	0.004	<0.001	0.011	0.134	0.05
Scanorama	<0.001	<0.001	<0.001	0.036	<0.001	0.002	0.057	0.036	0.444
MMD-ResNet	1	<0.001	<0.001	<0.001	<0.001	<0.001	<0.001	<0.001	<0.001	<0.001
ZINB-WaVE	<0.001	<0.001	<0.001	<0.001	<0.001	<0.001	0.188	0.315	<0.001	<0.001	<0.001
scMerge	<0.001	<0.001	<0.001	<0.001	<0.001	<0.001	<0.001	<0.001	<0.001	<0.001	<0.001	<0.001
LIGER	<0.001	<0.001	0.936	<0.001	<0.001	<0.001	<0.001	<0.001	<0.001	<0.001	<0.001	<0.001	<0.001
ARI cell type dataset 10
	Raw	Seurat_2	Seurat_3	Harmony	fastMNN	MNN_Correct	ComBat	limma	scGen	Scanorama	MMD-ResNet	ZINB-WaVE	scMerge
Seurat_2	<0.001
Seurat_3	<0.001	<0.001
Harmony	<0.001	<0.001	<0.001
fastMNN	<0.001	0.009	<0.001	<0.001
MNN_Correct	<0.001	<0.001	0.104	<0.001	<0.001
ComBat	<0.001	<0.001	0.007	0.191	<0.001	0.001
limma	<0.001	<0.001	0.127	0.004	<0.001	0.034	0.089
scGen	<0.001	<0.001	<0.001	<0.001	<0.001	<0.001	<0.001	<0.001
Scanorama	<0.001	<0.001	<0.001	0.629	<0.001	<0.001	0.755	0.012	<0.001
MMD-ResNet	1	<0.001	<0.001	<0.001	<0.001	<0.001	<0.001	<0.001	<0.001	<0.001
ZINB-WaVE	<0.001	<0.001	0.003	0.093	<0.001	<0.001	0.893	0.121	<0.001	0.198	<0.001
scMerge	<0.001	0.044	<0.001	<0.001	<0.001	<0.001	<0.001	<0.001	<0.001	<0.001	<0.001	<0.001
LIGER	<0.001	<0.001	0.701	0.005	<0.001	0.579	0.044	0.309	<0.001	0.004	<0.001	0.034	<0.001
ASW batch dataset 10
	Raw	Seurat_2	Seurat_3	Harmony	fastMNN	MNN_Correct	ComBat	limma	scGen	Scanorama	MMD-ResNet	ZINB-WaVE	scMerge
Seurat_2	<0.001
Seurat_3	<0.001	<0.001
Harmony	<0.001	<0.001	<0.001
fastMNN	<0.001	<0.001	<0.001	<0.001
MNN_Correct	<0.001	<0.001	<0.001	<0.001	<0.001
ComBat	<0.001	<0.001	<0.001	<0.001	<0.001	<0.001
limma	<0.001	<0.001	<0.001	<0.001	<0.001	<0.001	<0.001
scGen	<0.001	<0.001	<0.001	<0.001	<0.001	<0.001	<0.001	<0.001
Scanorama	<0.001	<0.001	<0.001	<0.001	<0.001	<0.001	<0.001	<0.001	<0.001
MMD-ResNet	0.28	<0.001	<0.001	<0.001	<0.001	<0.001	<0.001	<0.001	<0.001	<0.001
ZINB-WaVE	<0.001	<0.001	<0.001	0.461	<0.001	<0.001	<0.001	<0.001	<0.001	<0.001	<0.001
scMerge	<0.001	<0.001	<0.001	<0.001	<0.001	<0.001	<0.001	<0.001	<0.001	<0.001	<0.001	<0.001
LIGER	<0.001	<0.001	<0.001	<0.001	0.005	<0.001	<0.001	<0.001	<0.001	<0.001	<0.001	<0.001	<0.001
ASW cell type dataset 10
	Raw	Seurat_2	Seurat_3	Harmony	fastMNN	MNN_Correct	ComBat	limma	scGen	Scanorama	MMD-ResNet	ZINB-WaVE	scMerge
Seurat_2	<0.001
Seurat_3	<0.001	<0.001
Harmony	<0.001	<0.001	<0.001
fastMNN	<0.001	<0.001	<0.001	<0.001
MNN_Correct	<0.001	<0.001	<0.001	<0.001	<0.001
ComBat	<0.001	<0.001	0.002	<0.001	<0.001	<0.001
limma	<0.001	<0.001	<0.001	<0.001	<0.001	<0.001	<0.001
scGen	<0.001	<0.001	<0.001	<0.001	<0.001	0.547	<0.001	<0.001
Scanorama	<0.001	<0.001	<0.001	<0.001	<0.001	<0.001	<0.001	<0.001	<0.001
MMD-ResNet	0.145	<0.001	<0.001	<0.001	<0.001	<0.001	<0.001	<0.001	<0.001	<0.001
ZINB-WaVE	<0.001	<0.001	<0.001	<0.001	<0.001	<0.001	<0.001	<0.001	<0.001	<0.001	<0.001
scMerge	<0.001	<0.001	<0.001	<0.001	<0.001	<0.001	<0.001	<0.001	<0.001	<0.001	<0.001	<0.001
LIGER	<0.001	<0.001	0.403	<0.001	<0.001	<0.001	<0.001	<0.001	<0.001	<0.001	<0.001	<0.001	<0.001
iLISI dataset 10
	Raw	Seurat_2	Seurat_3	Harmony	fastMNN	MNN_Correct	ComBat	limma	scGen	Scanorama	MMD-ResNet	ZINB-WaVE	scMerge
Seurat_2	<0.001
Seurat_3	<0.001	<0.001
Harmony	<0.001	<0.001	<0.001
fastMNN	<0.001	<0.001	<0.001	<0.001
MNN_Correct	<0.001	<0.001	<0.001	<0.001	<0.001
ComBat	<0.001	<0.001	<0.001	<0.001	<0.001	<0.001
limma	<0.001	<0.001	<0.001	<0.001	<0.001	<0.001	<0.001
scGen	<0.001	<0.001	<0.001	<0.001	<0.001	<0.001	<0.001	<0.001
Scanorama	<0.001	<0.001	<0.001	<0.001	<0.001	<0.001	<0.001	<0.001	<0.001
MMD-ResNet	0.536	<0.001	<0.001	<0.001	<0.001	<0.001	<0.001	<0.001	<0.001	<0.001
ZINB-WaVE	<0.001	<0.001	<0.001	<0.001	<0.001	0.064	<0.001	<0.001	<0.001	<0.001	<0.001
scMerge	<0.001	<0.001	<0.001	<0.001	<0.001	<0.001	<0.001	<0.001	<0.001	<0.001	<0.001	<0.001
LIGER	<0.001	0.057	<0.001	<0.001	<0.001	<0.001	<0.001	<0.001	<0.001	<0.001	<0.001	<0.001	<0.001
cLISI dataset 10
	Raw	Seurat_2	Seurat_3	Harmony	fastMNN	MNN_Correct	ComBat	limma	scGen	Scanorama	MMD-ResNet	ZINB-WaVE	scMerge
Seurat_2	<0.001
Seurat_3	<0.001	<0.001
Harmony	<0.001	<0.001	0.1
fastMNN	<0.001	<0.001	<0.001	<0.001
MNN_Correct	<0.001	<0.001	<0.001	0.276	<0.001
ComBat	0.017	<0.001	<0.001	<0.001	<0.001	<0.001
limma	<0.001	<0.001	<0.001	<0.001	<0.001	<0.001	0.021
scGen	<0.001	<0.001	<0.001	<0.001	<0.001	<0.001	0.002	0.701
Scanorama	<0.001	<0.001	0.009	<0.001	<0.001	<0.001	<0.001	<0.001	<0.001
MMD-ResNet	0.953	<0.001	<0.001	<0.001	<0.001	<0.001	0.019	<0.001	<0.001	<0.001
ZINB-WaVE	<0.001	0.009	<0.001	<0.001	<0.001	<0.001	<0.001	<0.001	<0.001	<0.001	<0.001
scMerge	<0.001	<0.001	<0.001	<0.001	<0.001	<0.001	<0.001	<0.001	<0.001	<0.001	<0.001	<0.001
LIGER	<0.001	<0.001	<0.001	<0.001	<0.001	<0.001	<0.001	<0.001	<0.001	<0.001	<0.001	<0.001	<0.001
kBET dataset 10
	Raw	Seurat_2	Seurat_3	Harmony	fastMNN	MNN_Correct	ComBat	limma	scGen	Scanorama	MMD-ResNet	ZINB-WaVE	scMerge
Seurat_2	<0.001
Seurat_3	<0.001	<0.001
Harmony	<0.001	<0.001	<0.001
fastMNN	<0.001	<0.001	<0.001	<0.001
MNN_Correct	<0.001	<0.001	<0.001	<0.001	<0.001
ComBat	<0.001	<0.001	<0.001	<0.001	<0.001	<0.001
limma	<0.001	<0.001	<0.001	<0.001	<0.001	<0.001	<0.001
scGen	<0.001	<0.001	<0.001	<0.001	<0.001	<0.001	<0.001	<0.001
Scanorama	<0.001	<0.001	0.031	<0.001	<0.001	<0.001	<0.001	<0.001	<0.001
MMD-ResNet	0.519	<0.001	<0.001	<0.001	<0.001	<0.001	<0.001	<0.001	<0.001	<0.001
ZINB-WaVE	<0.001	<0.001	<0.001	<0.001	<0.001	0.83	<0.001	<0.001	<0.001	<0.001	<0.001
scMerge	<0.001	<0.001	<0.001	<0.001	<0.001	<0.001	<0.001	<0.001	<0.001	<0.001	<0.001	<0.001
LIGER	<0.001	<0.001	<0.001	<0.001	<0.001	<0.001	<0.001	<0.001	<0.001	<0.001	<0.001	<0.001	<0.001
